# Supplementary material for: Enhanced intrinsic saturation magnetization of ZnxCo1−xFe2O4 nanocrystallites with metastable spinel inversion
Source: Royal Society of Chemistry journal article supplement (doi:10.1039/c9qm00012g), 2019-01-01
Supplement: c9qm00012g1.pdf [file c9qm00012g1.pdf]

## Supporting Information:

# Enhanced intrinsic saturation magnetization of $\text{Zn}_x\text{Co}_{1-x}\text{Fe}_2\text{O}_4$ nanocrystallites with metastable spinel inversion†

Henrik Lyder Andersen,<sup>a</sup> Cecilia Granados-Miralles,<sup>‡a</sup> Matilde Saura-Múzquiz,<sup>a</sup> Marian Stingaciu,<sup>\*a</sup> Jacob Larsen,<sup>b</sup> Frederik Søndergaard-Pedersen,<sup>a</sup> Jakob Voldum Ahlburg,<sup>a</sup> Lukas Keller,<sup>c</sup> Cathrine Frandsen<sup>b</sup> and Mogens Christensen<sup>\*a</sup>

<sup>a</sup>Center for Materials Crystallography, Department of Chemistry and Interdisciplinary Nanoscience Centre (iNANO), Aarhus University, DK-8000 Aarhus C, Denmark

<sup>b</sup>Department of Physics, Technical University of Denmark, DK-2800 Kgs. Lyngby, Denmark

<sup>c</sup>Laboratory for Neutron Scattering and Imaging, Paul Scherrer Institut, 5232 Villigen, Switzerland

<sup>‡</sup>Current address: Instituto de Cerámica y Vidrio, Consejo Superior de Investigaciones Científicas (CSIC), Kelsen 5, 28049 Madrid, Spain

<sup>\*</sup>Current address: Institute for Energy Technology, IFE Neutron Material Characterisation, Instituttveien 18, NO-2007 Kjeller, Norway

\*E-mail: mch@chem.au.dk

## Table of Contents

|                                                                                                                   |           |
|-------------------------------------------------------------------------------------------------------------------|-----------|
| <b>Saturation magnetization of <math>\text{Zn}_x\text{Co}_{1-x}\text{Fe}_2\text{O}_4</math> in the literature</b> | <b>2</b>  |
| <b>Powder diffraction data</b>                                                                                    | <b>3</b>  |
| Magnetic structure model                                                                                          | 3         |
| Refinement R-values                                                                                               | 4         |
| Rietveld refinements (x=0.0-0.3, As-synthesized)                                                                  | 5         |
| Rietveld refinements (x=0.4-0.7, As-synthesized)                                                                  | 6         |
| Rietveld refinements (x=0.8-1.0, As-synthesized)                                                                  | 7         |
| Rietveld refinements (x=0.0-0.3, Annealed)                                                                        | 8         |
| Rietveld refinements (x=0.4-1.0, Annealed)                                                                        | 9         |
| Peak sharpening and hematite impurity                                                                             | 10        |
| <b>Transmission electron microscopy images</b>                                                                    | <b>11</b> |
| TEM (x=0.2, As-synthesized)                                                                                       | 11        |
| TEM (x=0.4, As-synthesized)                                                                                       | 12        |
| TEM (x=0.8, As-synthesized)                                                                                       | 13        |
| TEM (x=0.2, Annealed)                                                                                             | 14        |
| TEM (x=0.4, Annealed)                                                                                             | 15        |
| TEM (x=0.8, Annealed)                                                                                             | 16        |
| <b>Scanning transmission electron microscopy and energy dispersive X-ray spectroscopy data</b>                    | <b>17</b> |
| STEM-EDS quantitative analysis summary                                                                            | 17        |
| STEM-EDS maps + spectrum (x=0.2, As-synthesized)                                                                  | 18        |
| STEM-EDS maps + spectrum (x=0.4, As-synthesized)                                                                  | 19        |
| STEM-EDS maps + spectrum (x=0.8, As-synthesized)                                                                  | 20        |
| STEM-EDS maps + spectrum (x=0.2, Annealed)                                                                        | 21        |
| STEM-EDS maps + spectrum (x=0.4, Annealed)                                                                        | 22        |
| STEM-EDS maps + spectrum (x=0.8, Annealed)                                                                        | 23        |
| <b>Vibrating sample magnetometry data</b>                                                                         | <b>24</b> |
| Hysteresis curves (x=0.0-1.0, As-synthesized)                                                                     | 24        |
| Hysteresis curves (x=0.0-1.0, Annealed)                                                                           | 25        |
| Coercive field and magnetic remanence                                                                             | 26        |
| <b>References</b>                                                                                                 | <b>27</b> |

## Saturation magnetization of $\text{Zn}_x\text{Co}_{1-x}\text{Fe}_2\text{O}_4$ in the literature

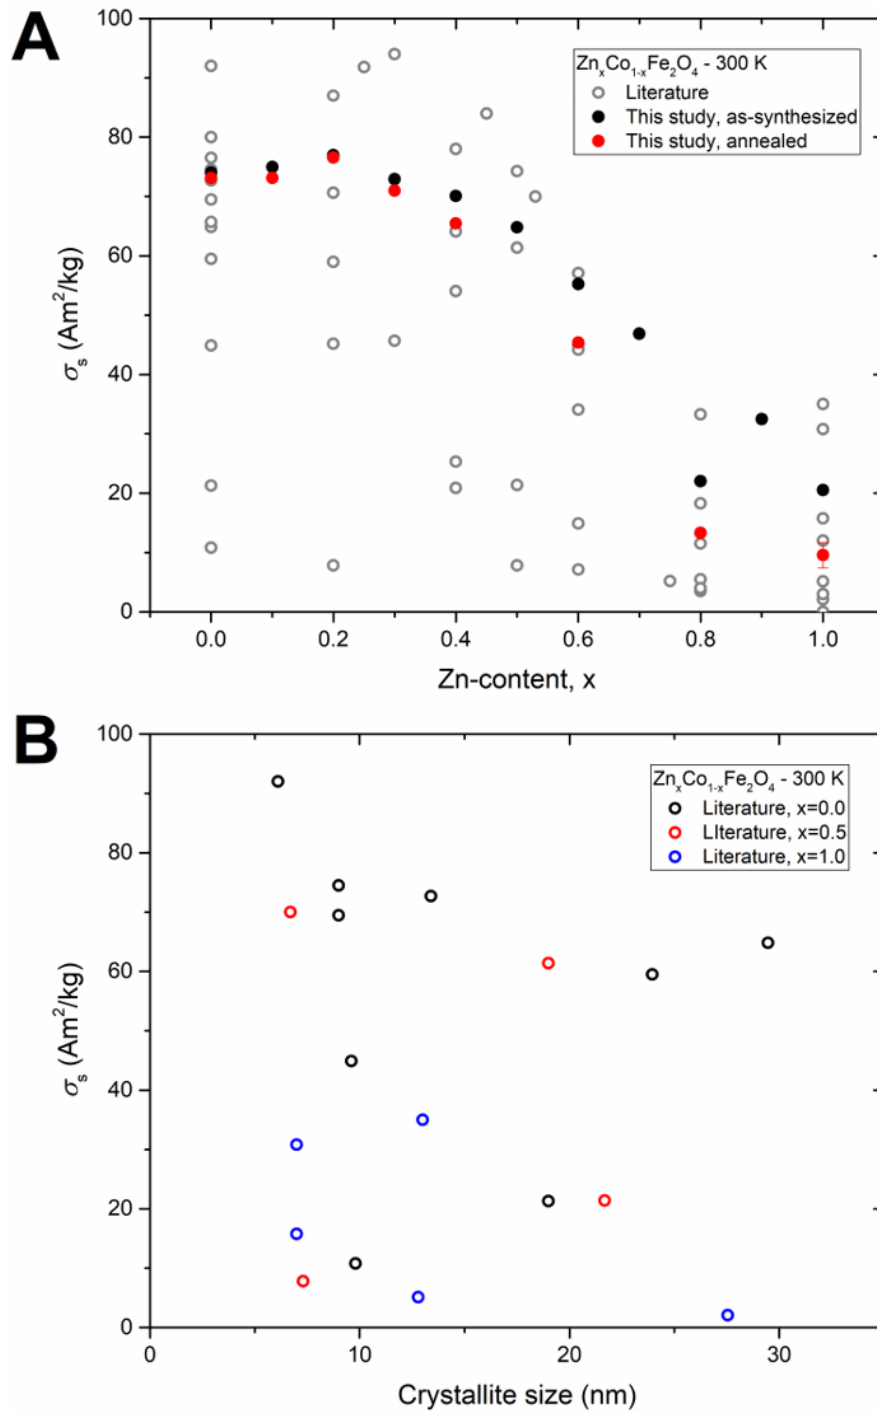

Figure S1: A) Room-temperature mass-specific saturation magnetizations,  $\sigma_s$ , of  $\text{Zn}_x\text{Co}_{1-x}\text{Fe}_2\text{O}_4$  nanocrystallites as function of Zn-content. Literature values are shown in grey and values from this study in black (as-synthesized) and red (annealed) dots. B) Literature values for room-temperature mass specific saturation magnetizations as function of crystallite size for selected compositions, *i.e.*  $x=0.0$  (black),  $x=0.5$  (red) and  $x=1.0$  (blue).<sup>1-10</sup>

## Powder diffraction data

### Magnetic structure model

The magnetic structure was implemented as an additional phase of the type "Magnetic Phase" with lowest symmetry space group of the corresponding centering, *i.e.*  $F-1$ . The special positions of the magnetic species ( $\text{Fe}^{3+}$  and  $\text{Co}^{2+}$  on the tetrahedral and octahedral sites) were specified, from which all magnetic spins were generated by providing the first 24 symmetry operations (see ESI<sup>†</sup>) of the  $Fd-3m$  space group and considering the centrosymmetry.

F -1            <--Space group symbol for hkl generation

!Nsym Cen Laue MagMat

24 2 1 1

!

SYMM x,y,z

MSYM u,v,w, 0.000

SYMM -x+3/4,-y+1/4,z+1/2

MSYM u,v,w, 0.000

SYMM -x+1/4,y+1/2,-z+3/4

MSYM u,v,w, 0.000

SYMM x+1/2,-y+3/4,-z+1/4

MSYM u,v,w, 0.000

SYMM z,x,y

MSYM u,v,w, 0.000

SYMM z+1/2,-x+3/4,-y+1/4

MSYM u,v,w, 0.000

SYMM -z+3/4,-x+1/4,y+1/2

MSYM u,v,w, 0.000

SYMM -z+1/4,x+1/2,-y+3/4

MSYM u,v,w, 0.000

SYMM y,z,x

MSYM u,v,w, 0.000

SYMM -y+1/4,z+1/2,-x+3/4

MSYM u,v,w, 0.000

SYMM y+1/2,-z+3/4,-x+1/4

MSYM u,v,w, 0.000

SYMM -y+3/4,-z+1/4,x+1/2

MSYM u,v,w, 0.000

SYMM y+3/4,x+1/4,-z+1/2

MSYM u,v,w, 0.000

SYMM -y,-x,-z

MSYM u,v,w, 0.000

SYMM y+1/4,-x+1/2,z+3/4

MSYM u,v,w, 0.000

SYMM -y+1/2,x+3/4,z+1/4

MSYM u,v,w, 0.000

SYMM x+3/4,z+1/4,-y+1/2

MSYM u,v,w, 0.000

SYMM -x+1/2,z+3/4,y+1/4

MSYM u,v,w, 0.000

SYMM -x,-z,-y

MSYM u,v,w, 0.000

SYMM  $x+1/4, -z+1/2, y+3/4$   
 MSYM  $u, v, w, 0.000$   
 SYMM  $z+3/4, y+1/4, -x+1/2$   
 MSYM  $u, v, w, 0.000$   
 SYMM  $z+1/4, -y+1/2, x+3/4$   
 MSYM  $u, v, w, 0.000$   
 SYMM  $-z+1/2, y+3/4, x+1/4$   
 MSYM  $u, v, w, 0.000$   
 SYMM  $-z, -y, -x$   
 MSYM  $u, v, w, 0.000$

## Refinement R-values

Table S1: Summary of R-values from the combined structural refinement of the PXRD and NPD data.

| Zn-content, x         | PXRD         |                 |           | NPD          |                 |           |                |
|-----------------------|--------------|-----------------|-----------|--------------|-----------------|-----------|----------------|
|                       | $R_{wp}$ (%) | $R_{Bragg}$ (%) | $R_F$ (%) | $R_{wp}$ (%) | $R_{Bragg}$ (%) | $R_F$ (%) | $R_{magn}$ (%) |
| <b>As-synthesized</b> |              |                 |           |              |                 |           |                |
| 0.0                   | 11.7         | 9.11            | 9.57      | 6.04         | 1.42            | 1.27      | 0.722          |
| 0.1                   | 9.75         | 3.38            | 3.21      | 5.17         | 0.861           | 0.688     | 0.627          |
| 0.2                   | 10.9         | 5.49            | 6.36      | 6.22         | 1.90            | 1.29      | 0.675          |
| 0.3                   | 10.5         | 3.60            | 3.41      | 7.62         | 1.07            | 0.896     | 1.35           |
| 0.4                   | 11.0         | 5.99            | 5.85      | 7.14         | 1.77            | 1.14      | 1.93           |
| 0.5                   | 10.3         | 5.27            | 4.95      | 7.70         | 1.80            | 1.39      | 2.53           |
| 0.6                   | 10.3         | 4.87            | 4.46      | 7.93         | 1.91            | 1.38      | 3.86           |
| 0.7                   | 10.3         | 2.16            | 2.06      | 10.7         | 2.04            | 1.60      | 3.19           |
| 0.8                   | 10.7         | 3.00            | 2.75      | 8.59         | 2.60            | 1.56      | 5.40           |
| 0.9                   | 10.3         | 2.41            | 2.05      | 9.90         | 1.44            | 1.40      | 3.92           |
| 1.0                   | 11.8         | 4.23            | 3.49      | 7.82         | 2.40            | 1.74      | 5.17           |
| <b>Annealed</b>       |              |                 |           |              |                 |           |                |
| 0.0                   | 4.12         | 3.53            | 3.56      | 5.25         | 1.96            | 1.34      | 1.77           |
| 0.1                   | 5.58         | 4.80            | 4.14      | 5.99         | 1.95            | 0.874     | 1.33           |
| 0.2                   | 4.87         | 4.59            | 4.11      | 10.8         | 4.26            | 2.98      | 4.05           |
| 0.3                   | 5.75         | 4.45            | 3.87      | 6.47         | 1.66            | 1.02      | 2.16           |
| 0.4                   | 5.60         | 3.78            | 3.38      | 9.22         | 3.95            | 2.42      | 6.01           |
| 0.6                   | 4.95         | 4.50            | 4.38      | 11.7         | 4.74            | 2.93      | 12.1           |
| 0.8                   | 5.24         | 3.89            | 3.99      | 12.9         | 3.51            | 2.47      | 9.76           |
| 1.0                   | 4.69         | 1.83            | 2.62      | 6.45         | 1.49            | 1.35      | 4.67           |

## Rietveld refinements ( $x=0.0-0.3$ , As-synthesized)

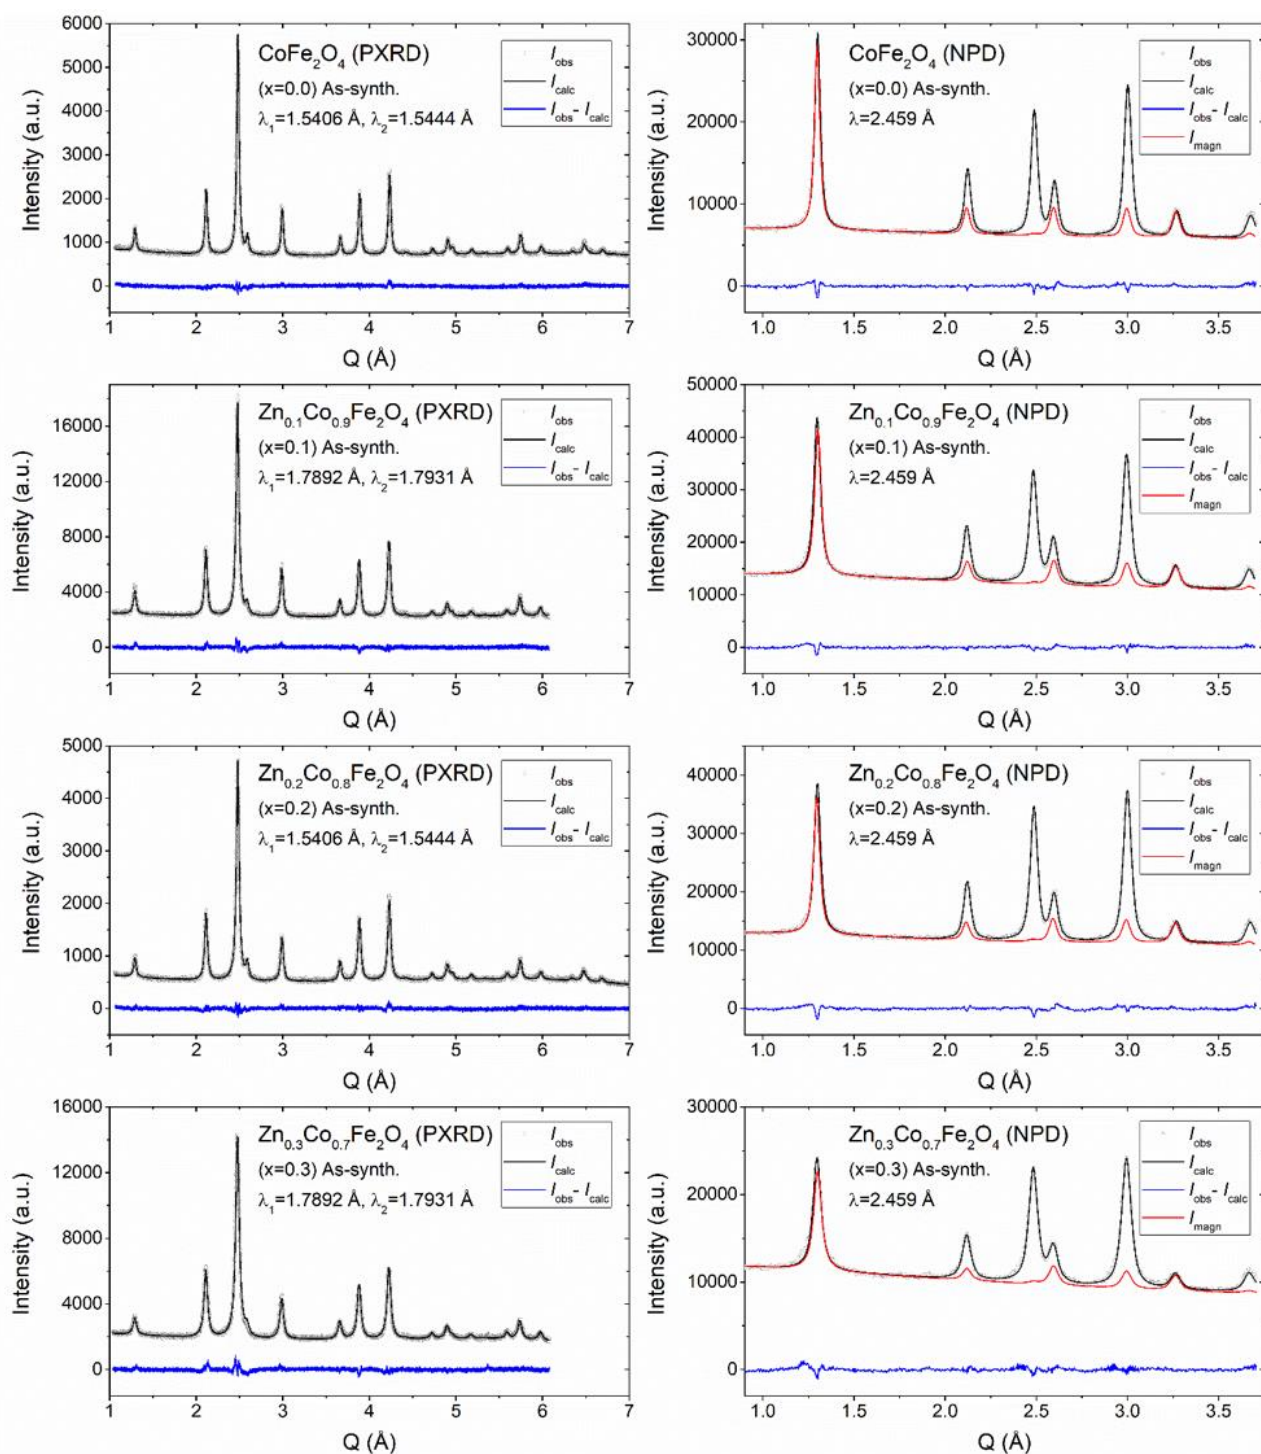

Figure S2: PXRD and NPD patterns of the indicated nanocrystalline samples and corresponding Rietveld fits obtained by combined refinement of a constrained structural model.

## Rietveld refinements ( $x=0.4-0.7$ , As-synthesized)

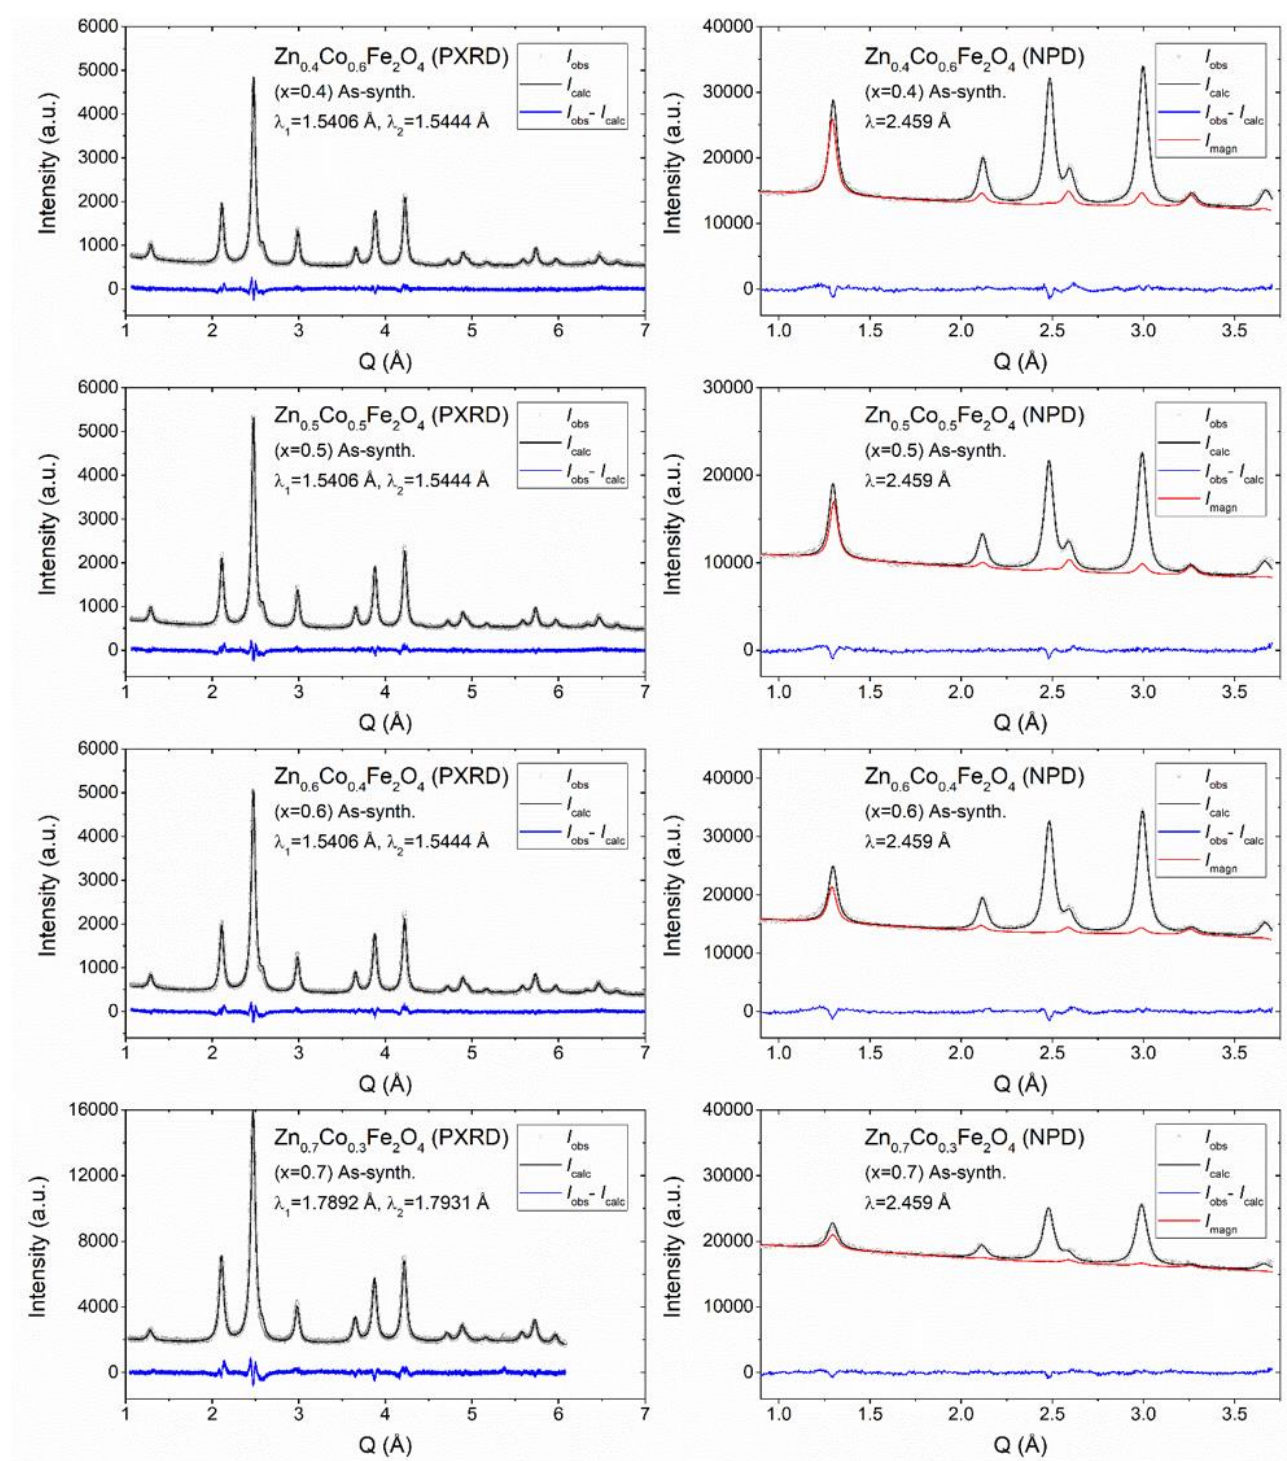

Figure S3: PXRD and NPD patterns of the indicated nanocrystalline samples and corresponding Rietveld fits obtained by combined refinement of a constrained structural model.

## Rietveld refinements ( $x=0.8-1.0$ , As-synthesized)

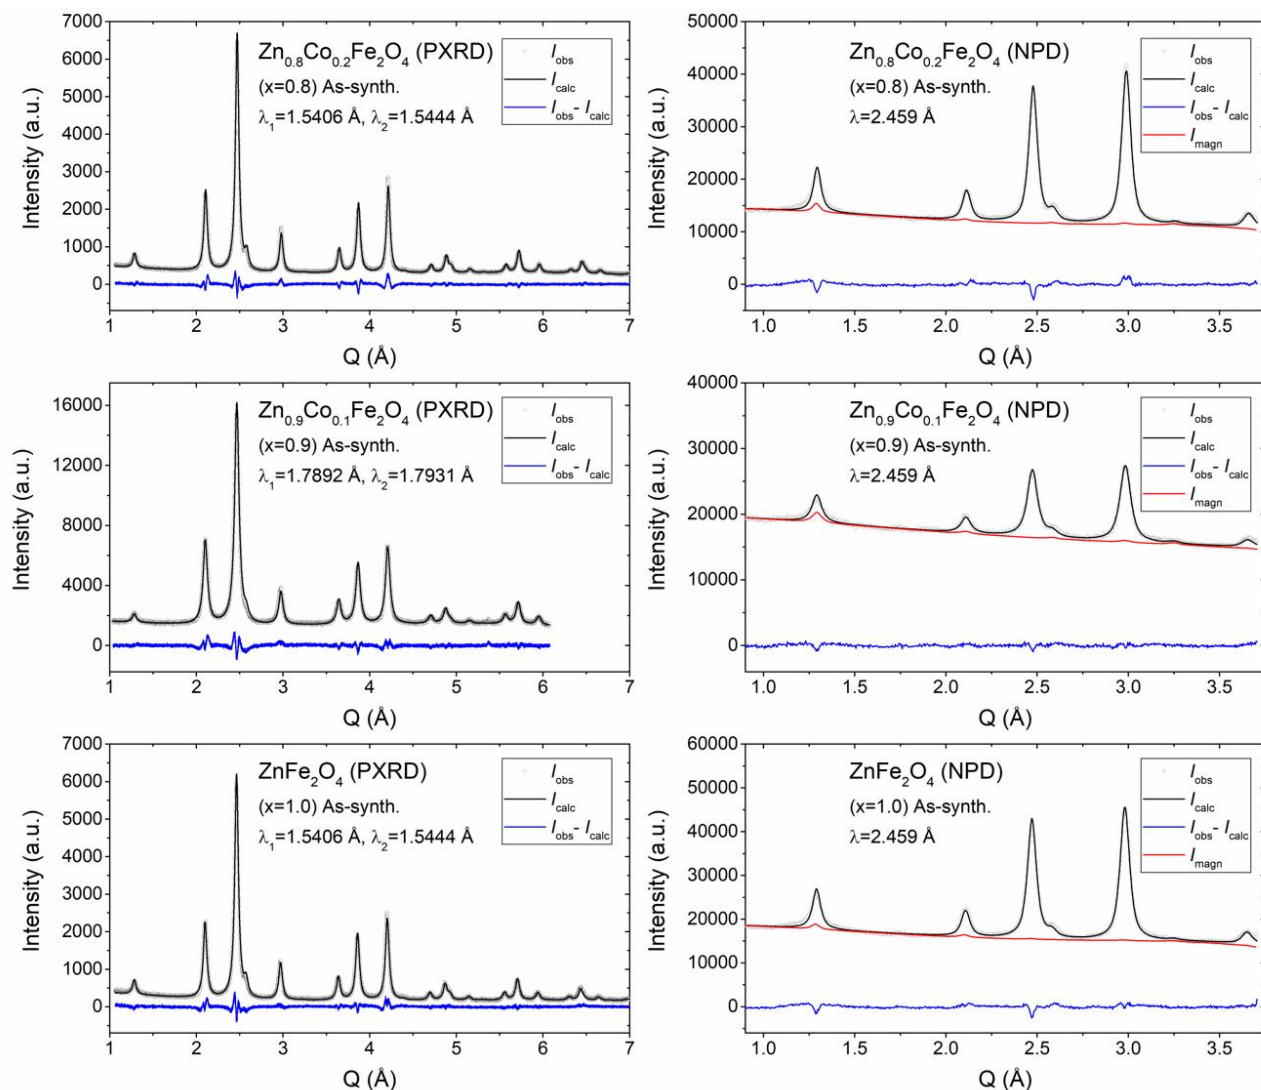

Figure S4: PXRD and NPD patterns of the indicated nanocrystalline samples and corresponding Rietveld fits obtained by combined refinement of a constrained structural model.



## Rietveld refinements ( $x=0.0-0.3$ , Annealed)

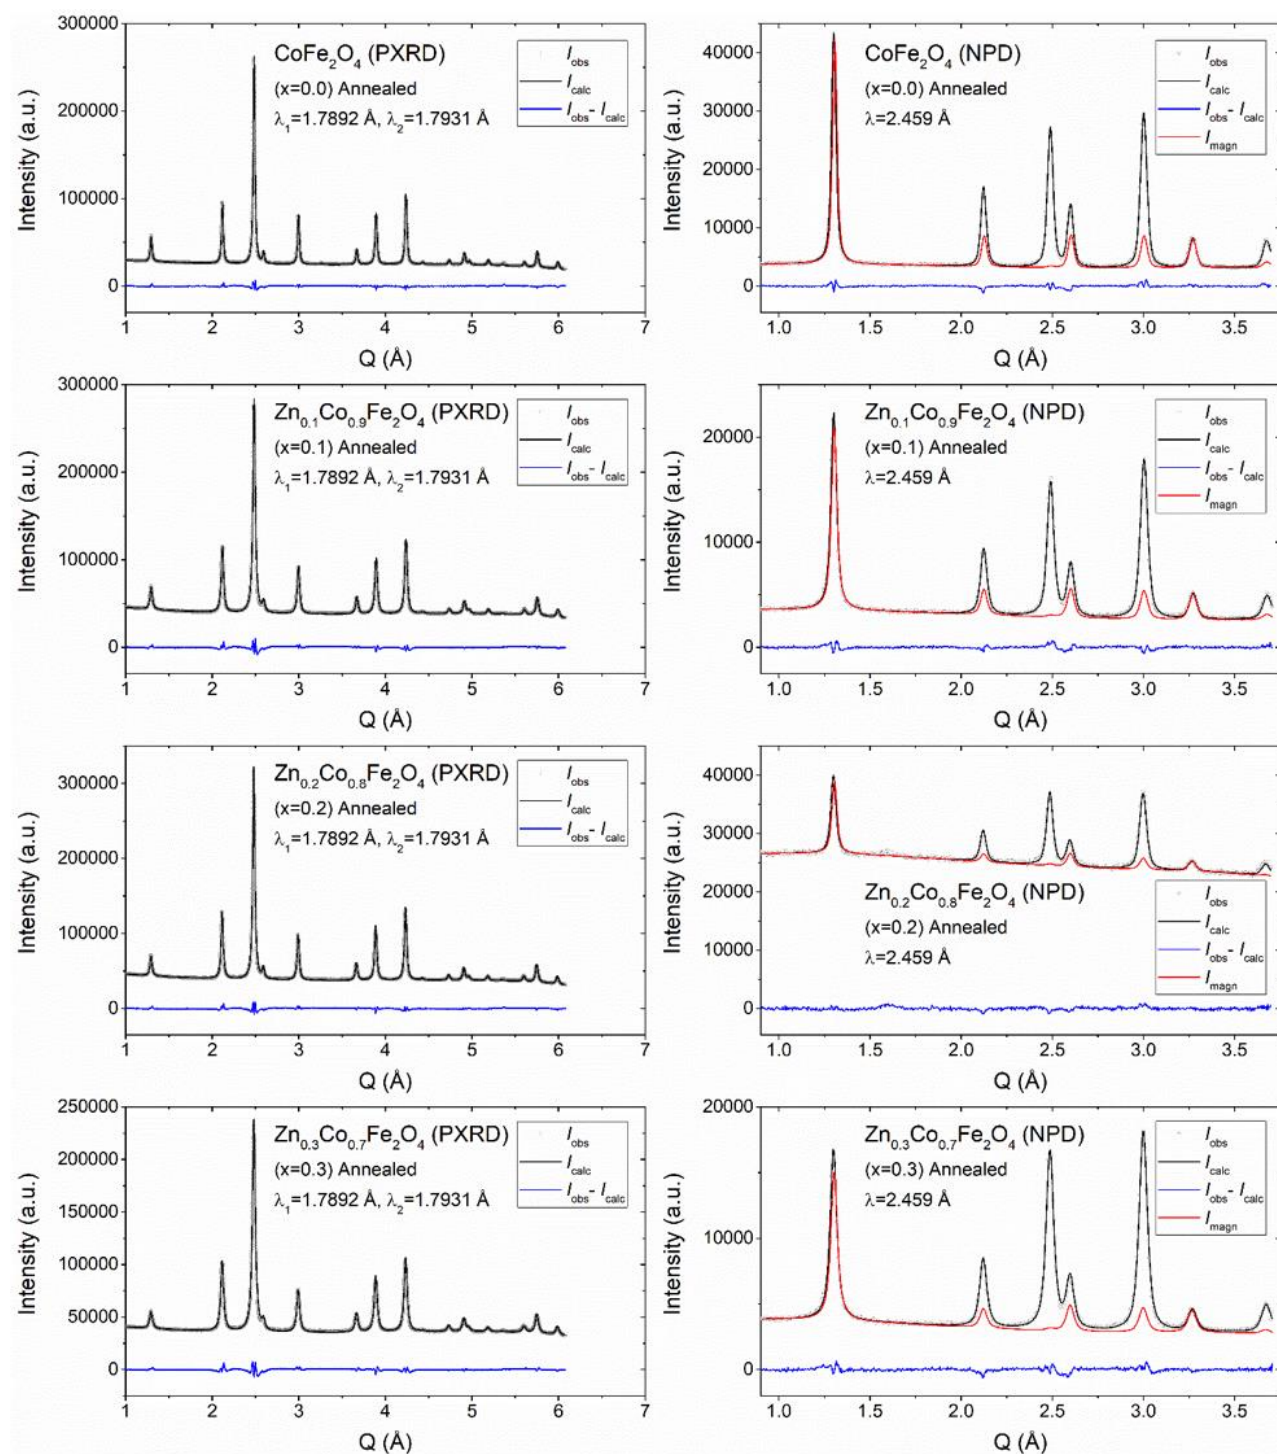

Figure S5: PXRD and NPD patterns of the indicated nanocrystalline samples and corresponding Rietveld fits obtained by combined refinement of a constrained structural model.



## Rietveld refinements ( $x=0.4-1.0$ , Annealed)

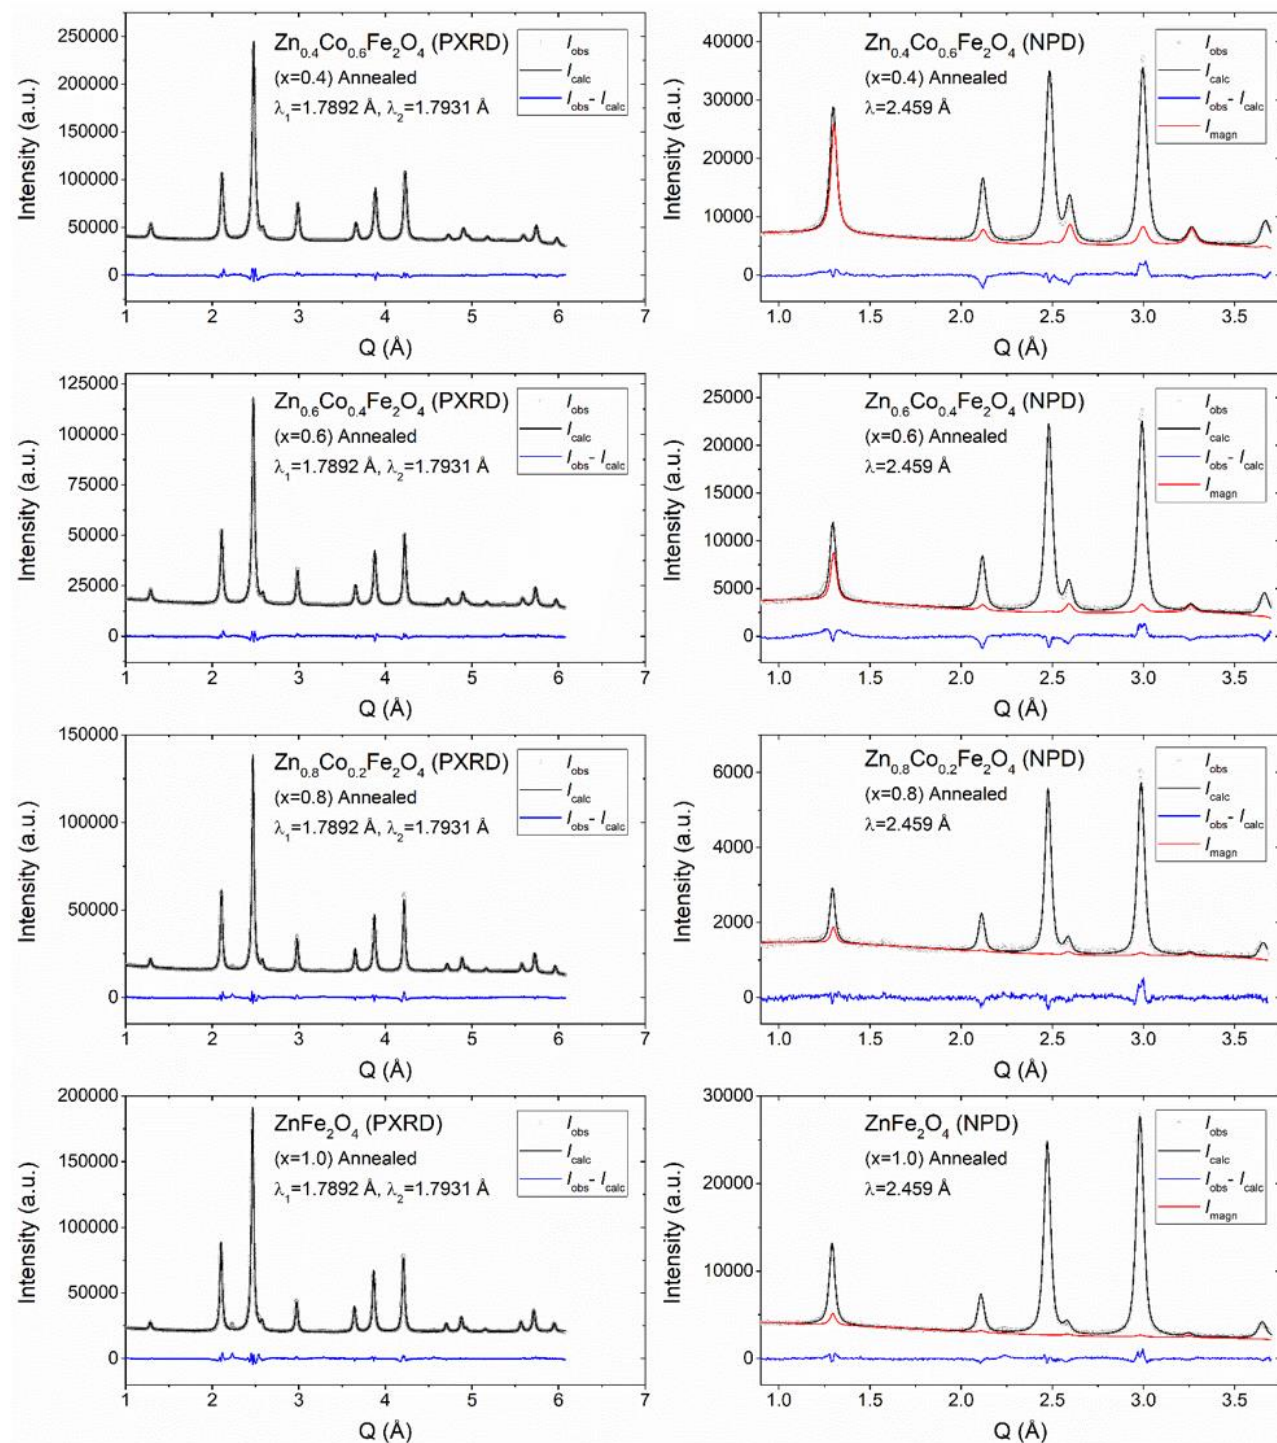

Figure S6: PXRD and NPD patterns of the indicated nanocrystalline samples and corresponding Rietveld fits obtained by combined refinement of a constrained structural model.

## Peak sharpening and hematite impurity

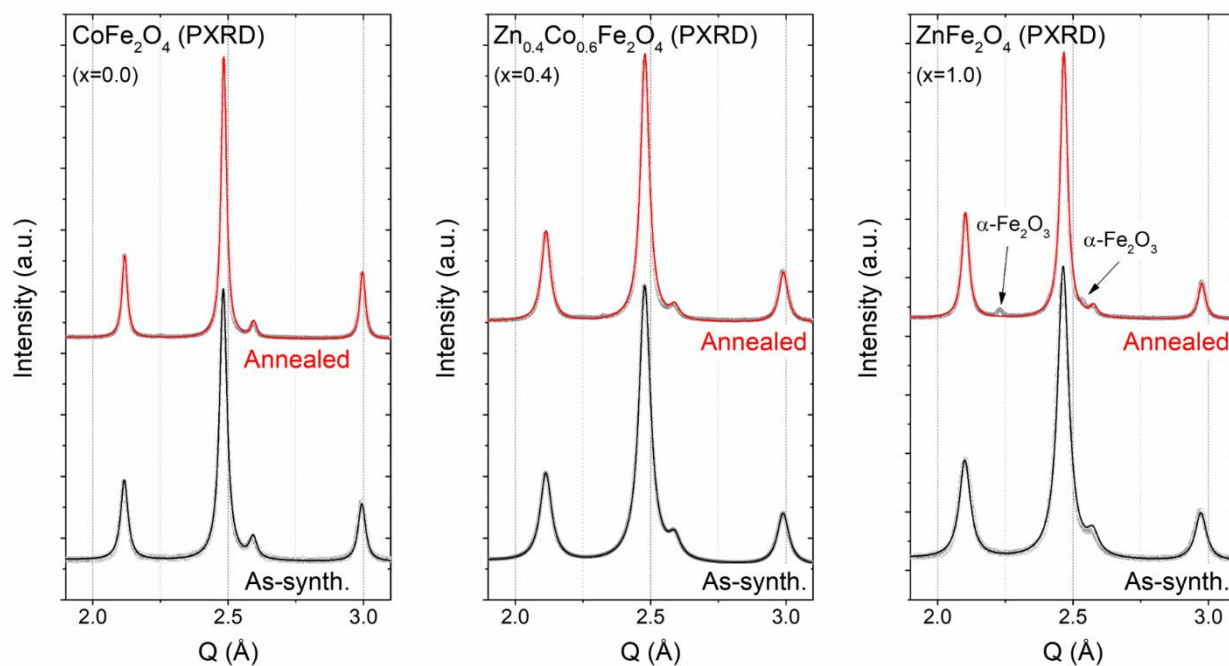

Figure S7: Enhancement of selected q-region of the PXRd data for the  $x=0.0$ ,  $x=0.4$  and  $x=1.0$  samples before and after annealing illustrating the slight peak sharpening after annealing. The additional peaks arising from the presence of a small amount ( $<5\%$ ) of hematite ( $\alpha\text{-Fe}_2\text{O}_3$ ) in the  $x=1.0$  sample are indicated in the figure.

## Transmission electron microscopy images

TEM ( $x=0.2$ , As-synthesized)

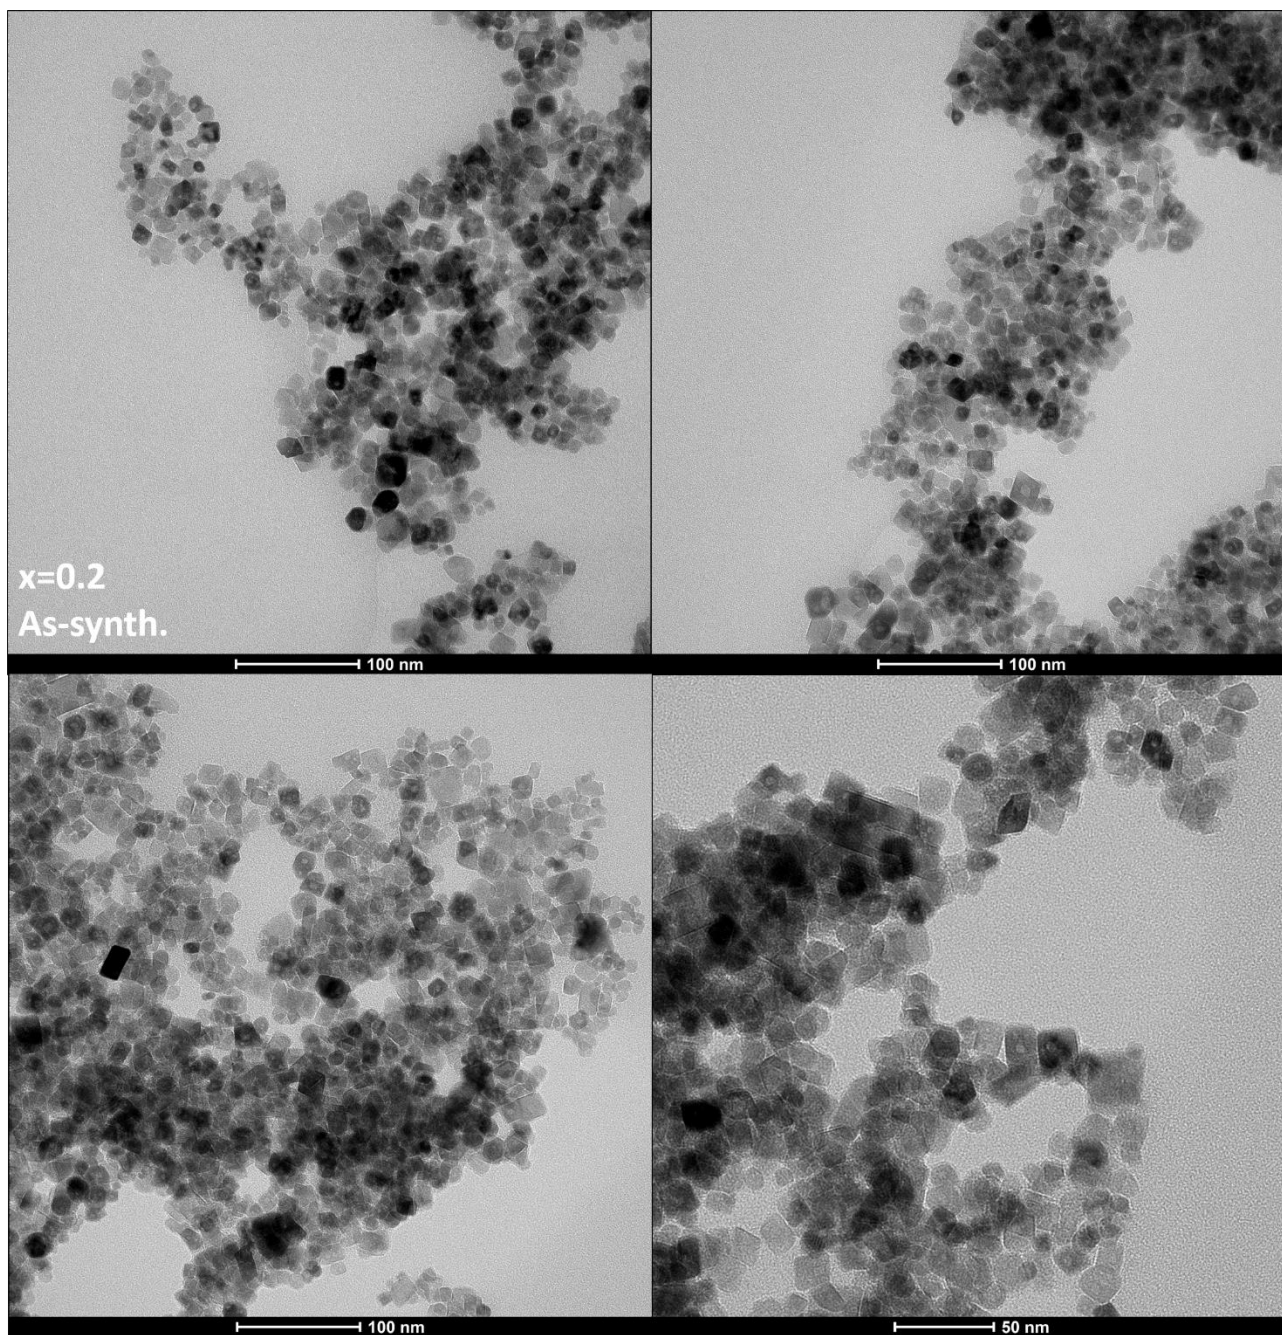

Figure S8: Additional TEM images of the as-synthesized  $\text{Zn}_{0.2}\text{Co}_{0.8}\text{Fe}_2\text{O}_4$  ( $x=0.2$ ) sample.



TEM ( $x=0.4$ , As-synthesized)

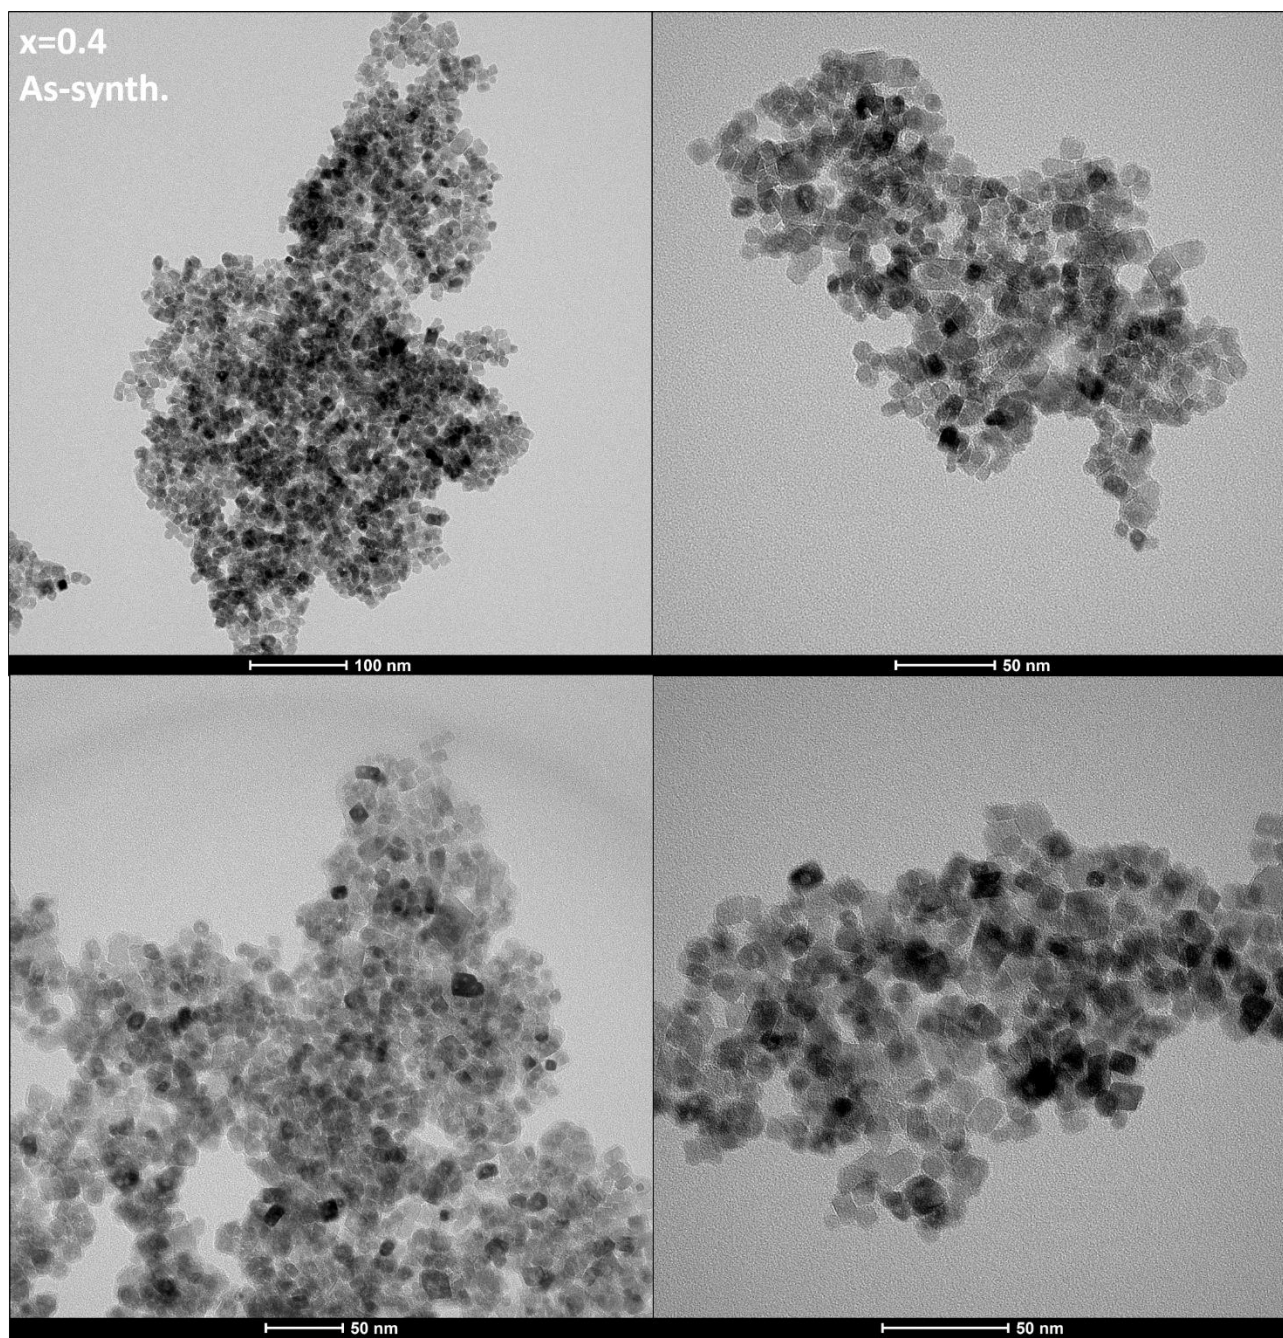

Figure S9: Additional TEM images of the as-synthesized  $\text{Zn}_{0.4}\text{Co}_{0.6}\text{Fe}_2\text{O}_4$  ( $x=0.4$ ) sample.

TEM ( $x=0.8$ , As-synthesized)

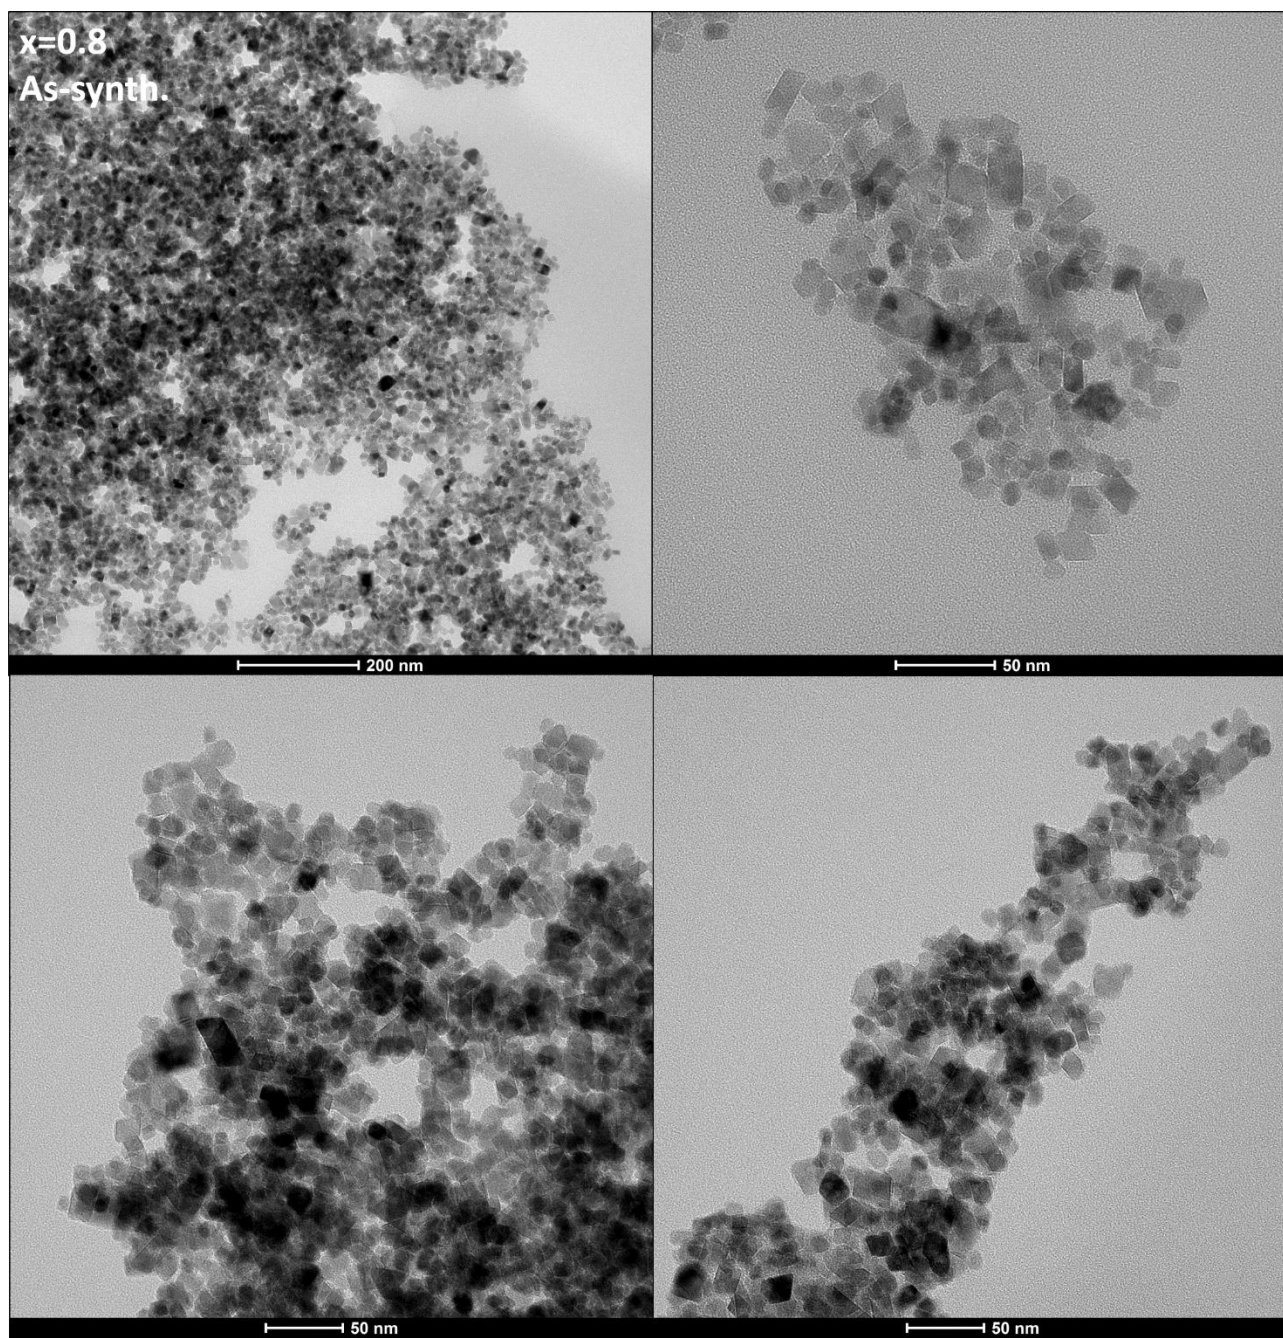

Figure S10: Additional TEM images of the as-synthesized  $\text{Zn}_{0.8}\text{Co}_{0.2}\text{Fe}_2\text{O}_4$  ( $x=0.8$ ) sample.

## TEM (x=0.2, Annealed)

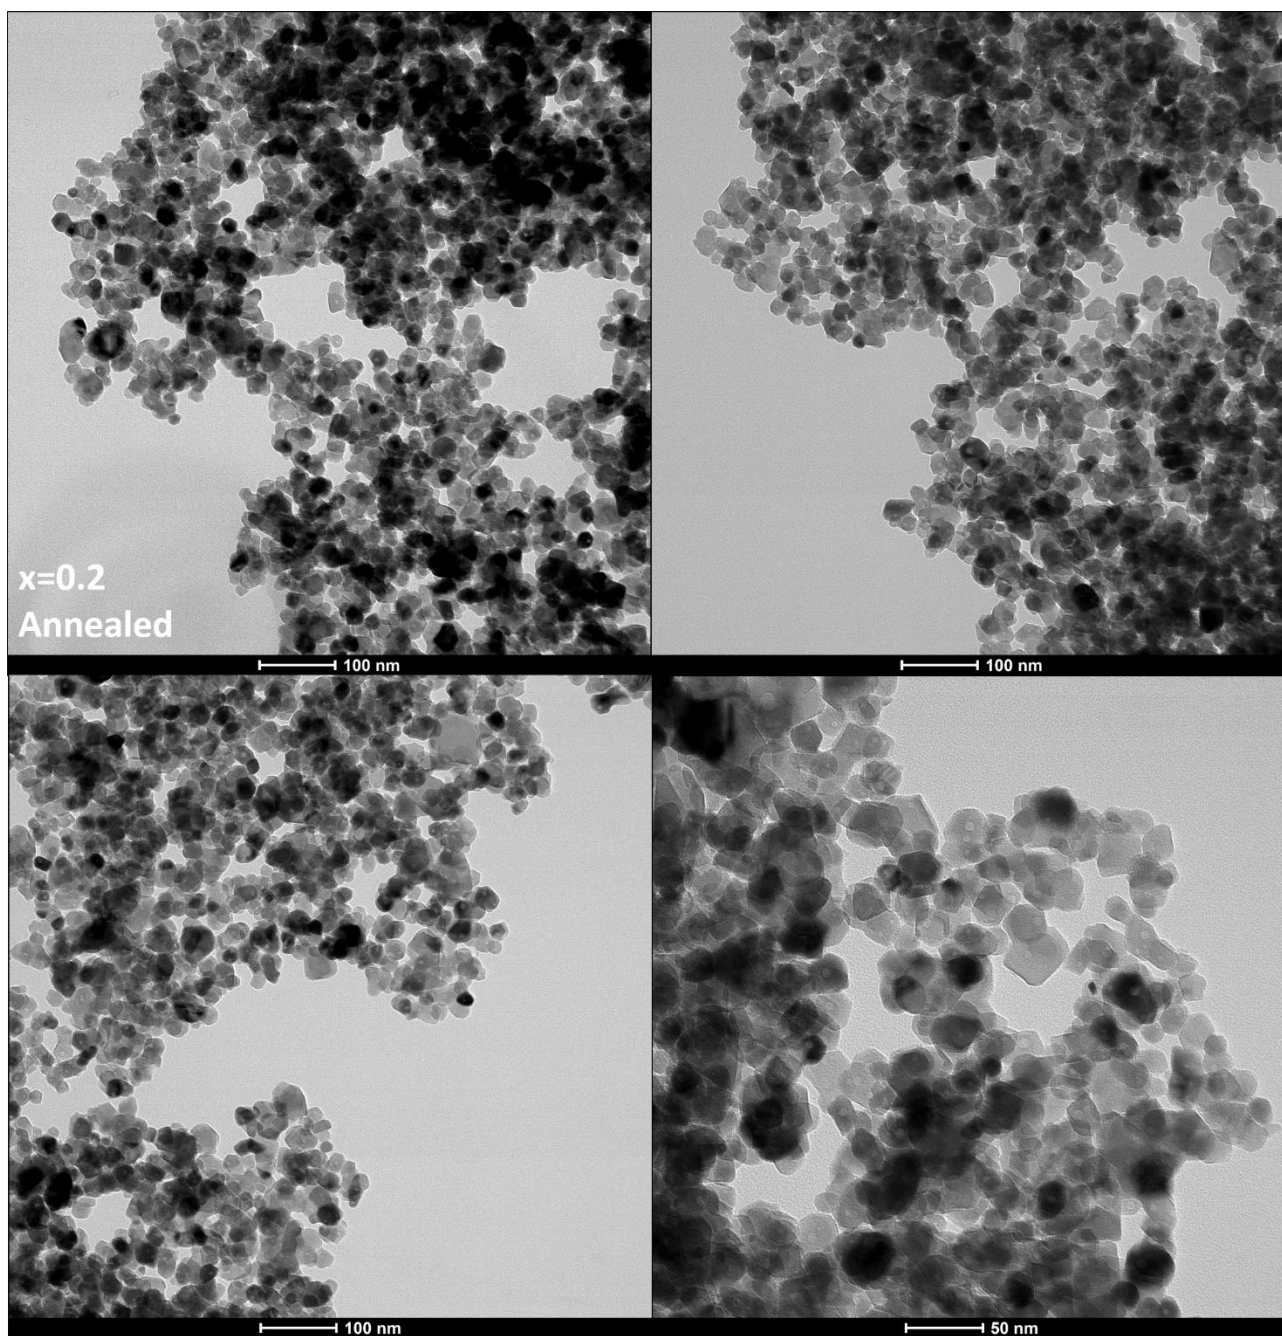

Figure S11: Additional TEM images of the annealed  $\text{Zn}_{0.2}\text{Co}_{0.8}\text{Fe}_2\text{O}_4$  (x=0.2) sample.



## TEM (x=0.4, Annealed)

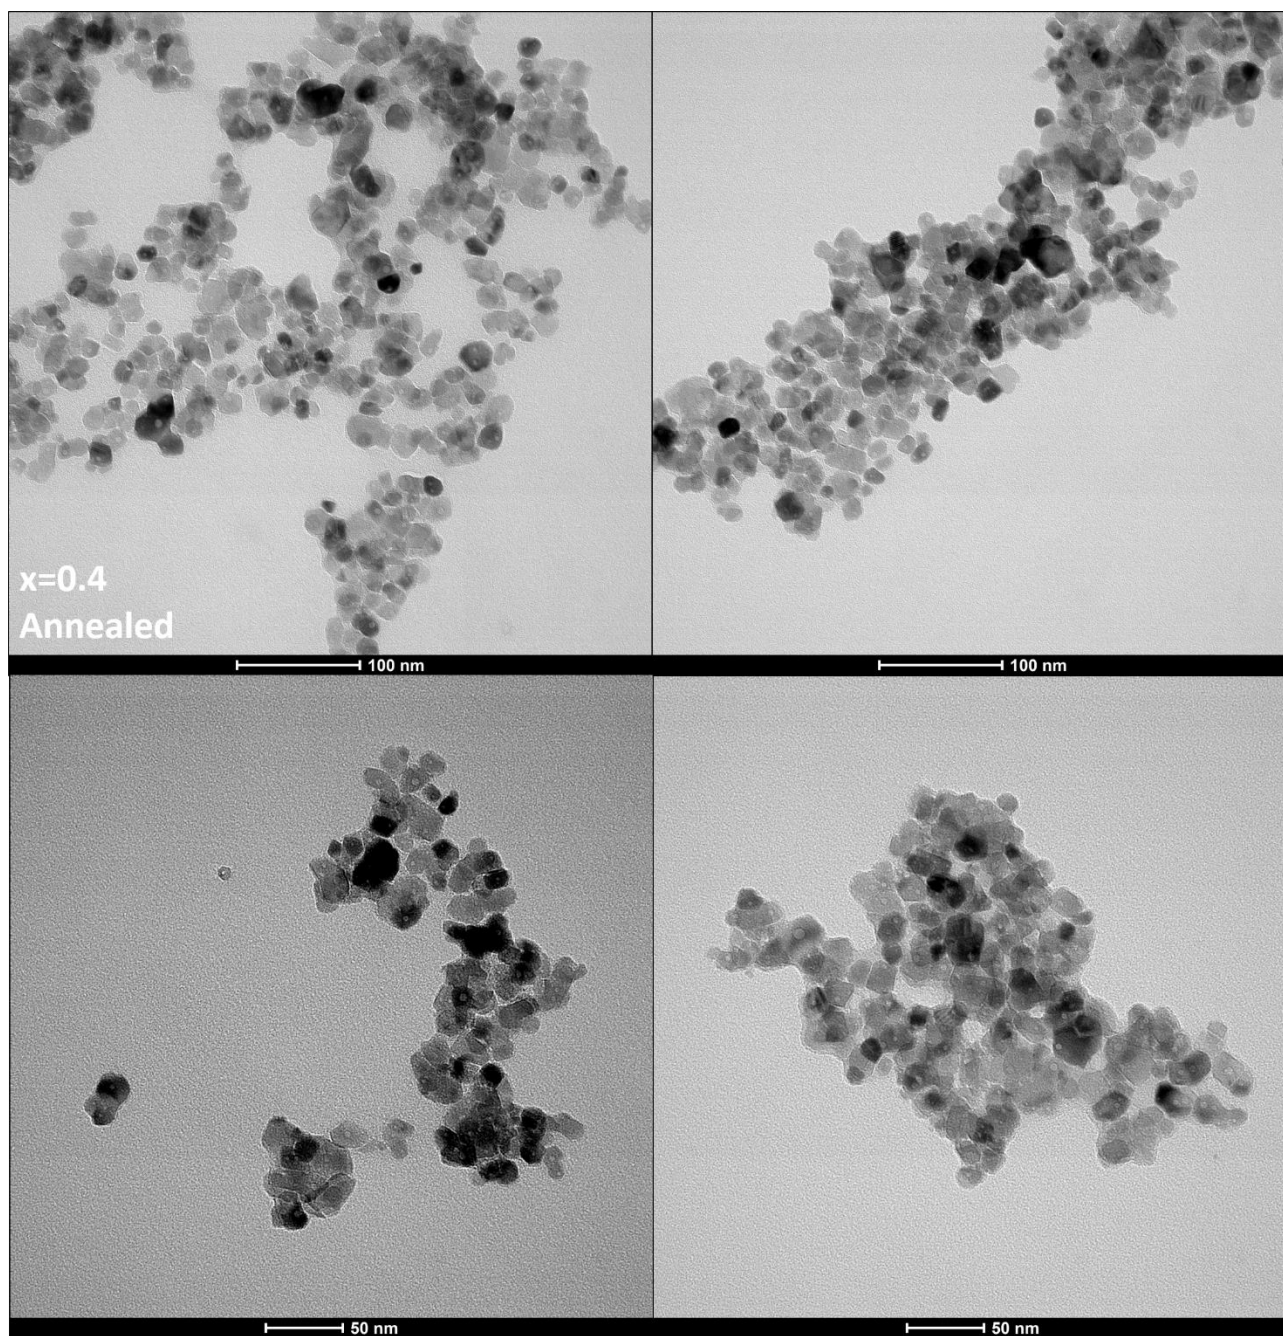

Figure S12: Additional TEM images of the annealed  $\text{Zn}_{0.4}\text{Co}_{0.6}\text{Fe}_2\text{O}_4$  (x=0.4) sample.

# TEM (x=0.8, Annealed)

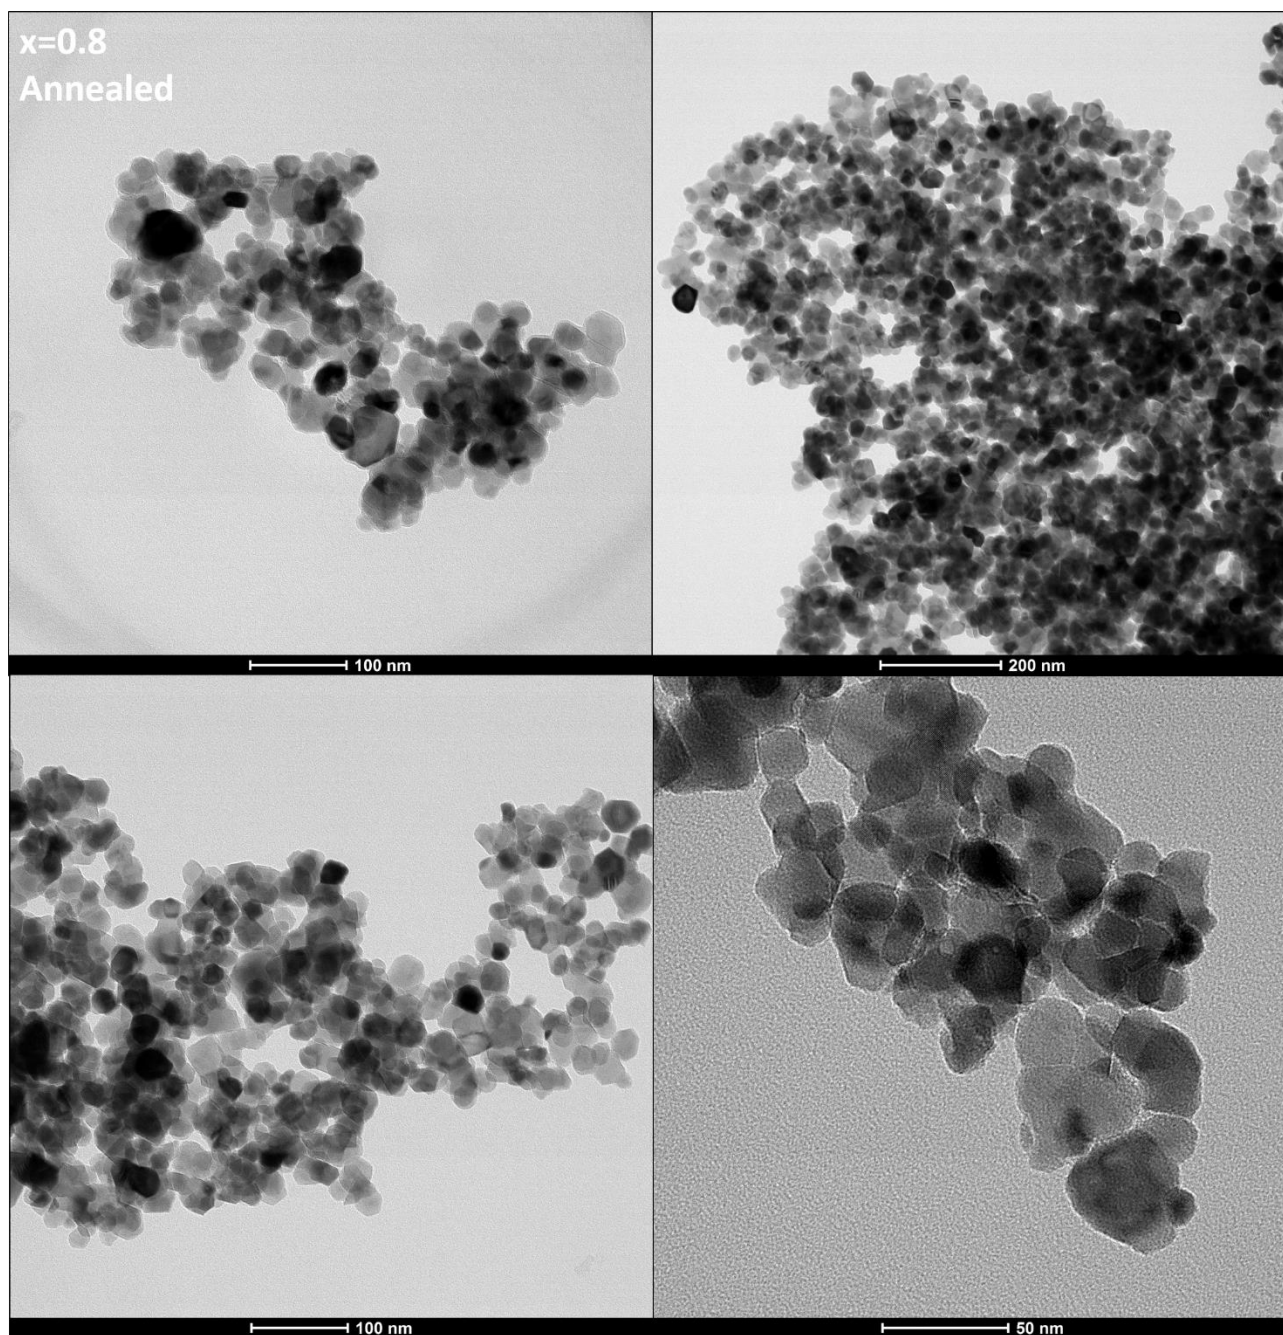

Figure S13: Additional TEM images of the annealed  $\text{Zn}_{0.8}\text{Co}_{0.2}\text{Fe}_2\text{O}_4$  (x=0.8) sample.

# Scanning transmission electron microscopy and energy dispersive X-ray spectroscopy data

## STEM-EDS quantitative analysis summary

Table S2: Elemental atomic percentages (at%) and stoichiometry (x EDS) obtained from the quantitative analysis of the energy dispersive X-ray spectra.

| x                     | Zn at%<br>(%) | Co at%<br>(%) | Fe at%<br>(%) | O at%<br>(%) | x EDS<br>$Zn^{2+}/M^{2+}$ |
|-----------------------|---------------|---------------|---------------|--------------|---------------------------|
| <b>As-synthesized</b> |               |               |               |              |                           |
| <b>0.2</b>            | 2.6(3)        | 10(1)         | 24(2)         | 64(6)        | 0.21(3)                   |
| <b>0.4</b>            | 4.0(4)        | 5.9(6)        | 19(2)         | 71(7)        | 0.40(5)                   |
| <b>0.8</b>            | 8.1(8)        | 1.9(3)        | 18(2)         | 72(7)        | 0.56(7)                   |
| <b>Annealed</b>       |               |               |               |              |                           |
| <b>0.2</b>            | 2.6(3)        | 10(1)         | 24(2)         | 63(6)        | 0.20(3)                   |
| <b>0.4</b>            | 5.0(5)        | 6.8(7)        | 22(2)         | 66(6)        | 0.42(5)                   |
| <b>0.8</b>            | 8.1(8)        | 2.0(2)        | 18(2)         | 72(7)        | 0.80(10)                  |

## STEM-EDS maps + spectrum ( $x=0.2$ , As-synthesized)

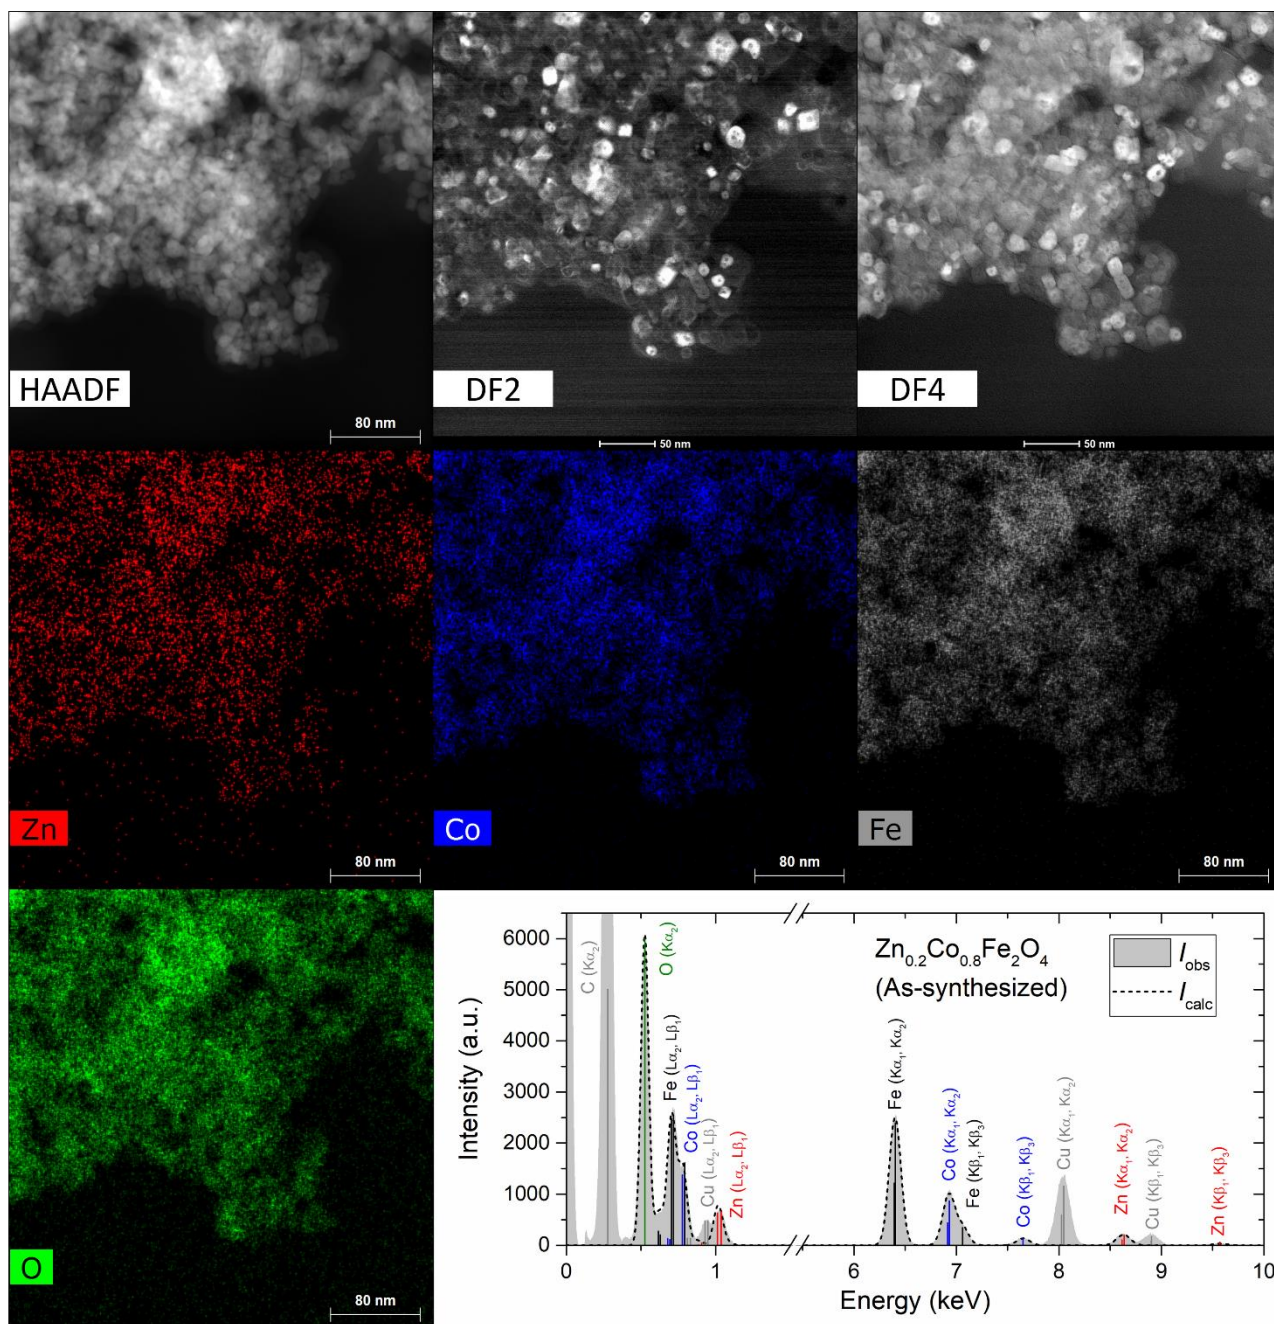

Figure S14: STEM-HAADF image, STEM-DF images and elemental maps illustrating the distribution of the constituent elements in the as-synthesized  $\text{Zn}_{0.2}\text{Co}_{0.8}\text{Fe}_2\text{O}_4$  ( $x=0.2$ ) sample. In the bottom right corner, the corresponding energy-dispersive X-ray spectrum from the region (gray area) and fit to the spectrum (dashed black line) is shown.



# STEM-EDS maps + spectrum ( $x=0.4$ , As-synthesized)

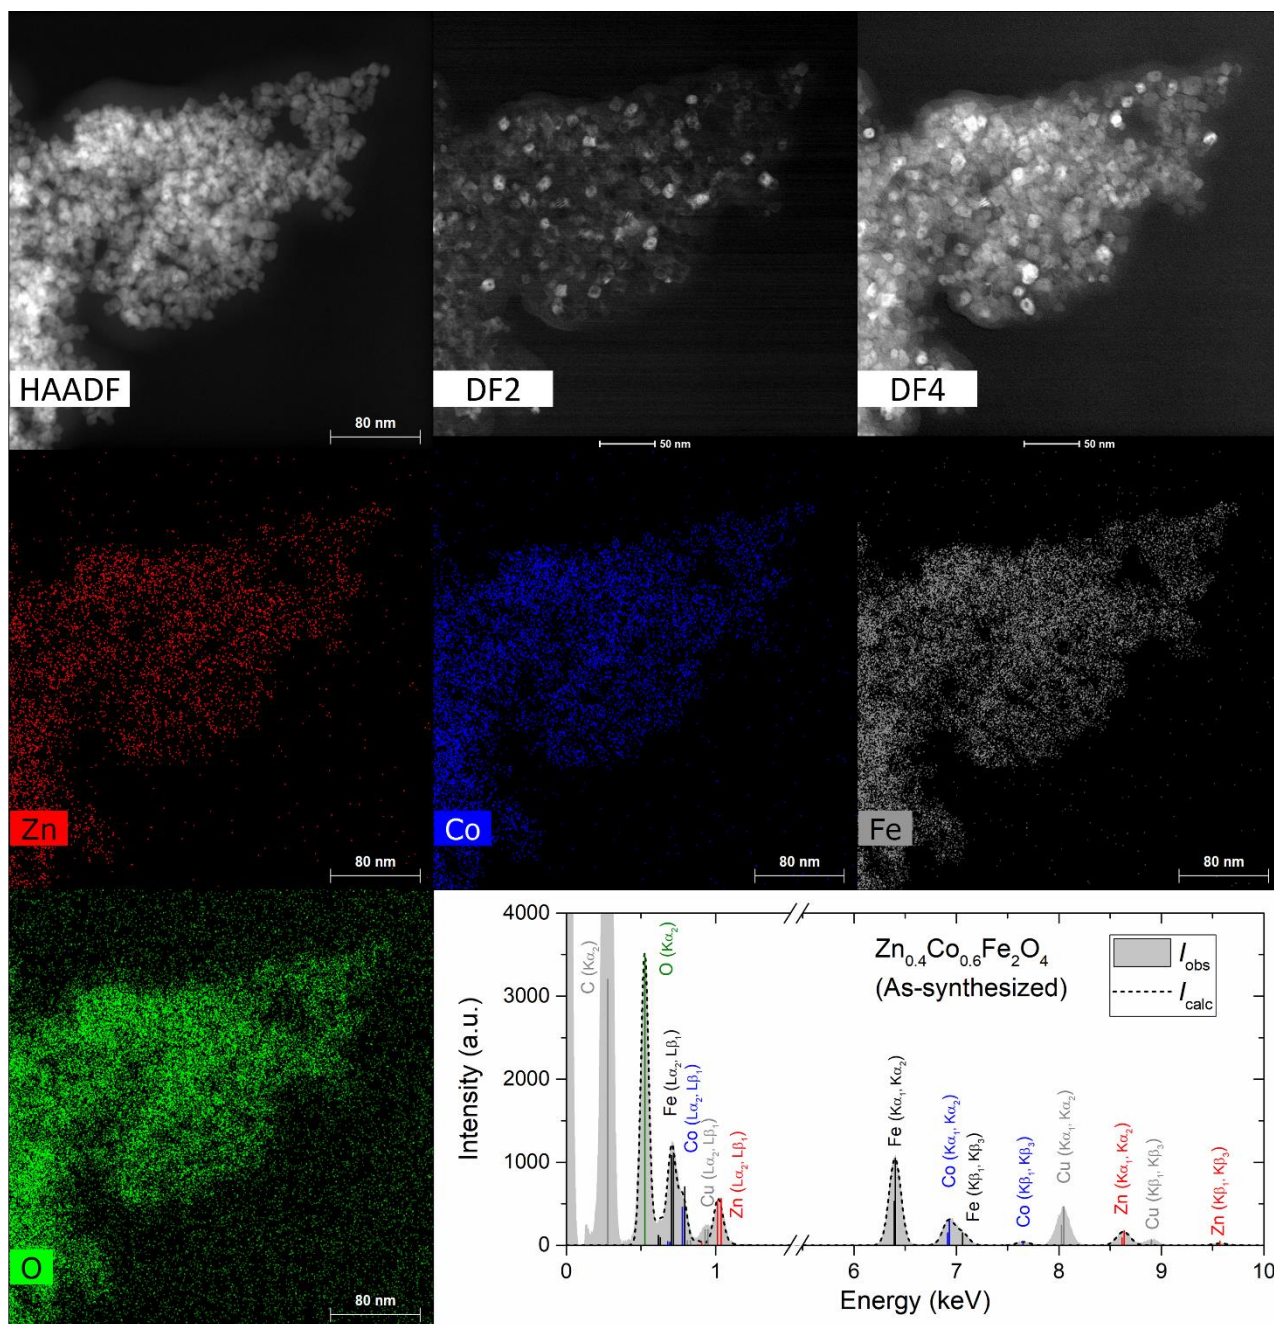

Figure S15: STEM-HAADF image, STEM-DF images and elemental maps illustrating the distribution of the constituent elements in the as-synthesized  $\text{Zn}_{0.4}\text{Co}_{0.6}\text{Fe}_2\text{O}_4$  ( $x=0.4$ ) sample. In the bottom right corner, the corresponding energy-dispersive X-ray spectrum from the region (gray area) and fit to the spectrum (dashed black line) is shown.

# STEM-EDS maps + spectrum ( $x=0.8$ , As-synthesized)

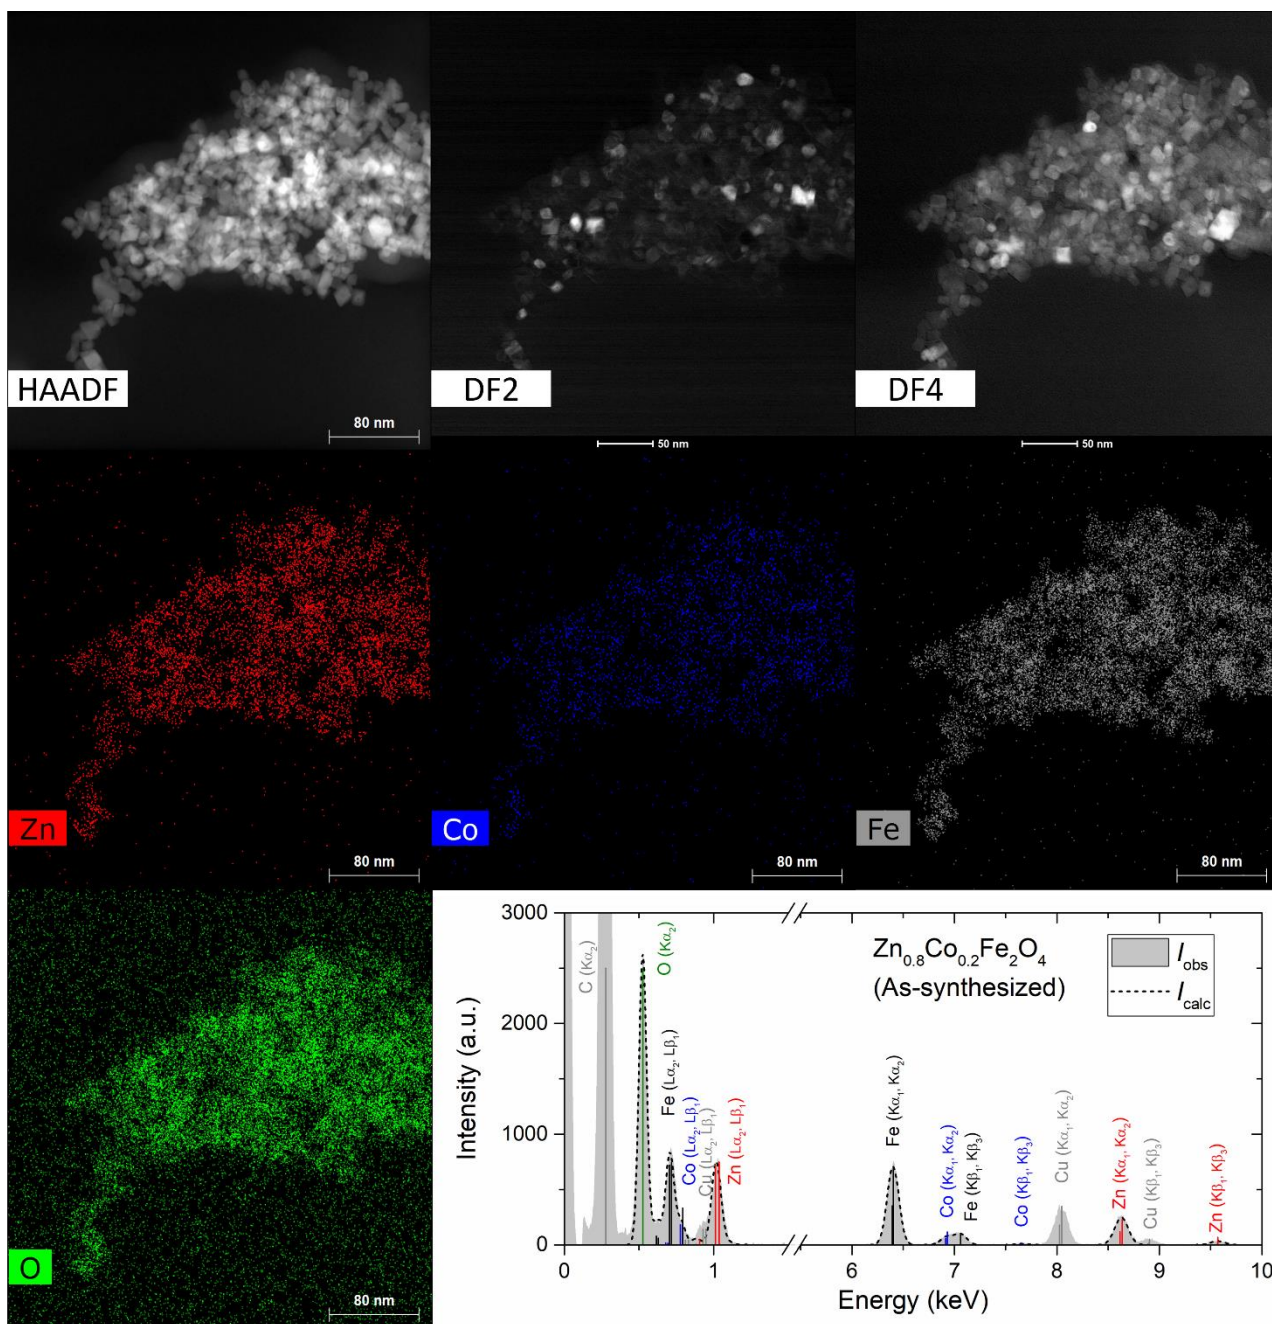

Figure S16: STEM-HAADF image, STEM-DF images and elemental maps illustrating the distribution of the constituent elements in the as-synthesized  $\text{Zn}_{0.8}\text{Co}_{0.2}\text{Fe}_2\text{O}_4$  ( $x=0.8$ ) sample. In the bottom right corner, the corresponding energy-dispersive X-ray spectrum from the region (gray area) and fit to the spectrum (dashed black line) is shown.



## STEM-EDS maps + spectrum ( $x=0.2$ , Annealed)

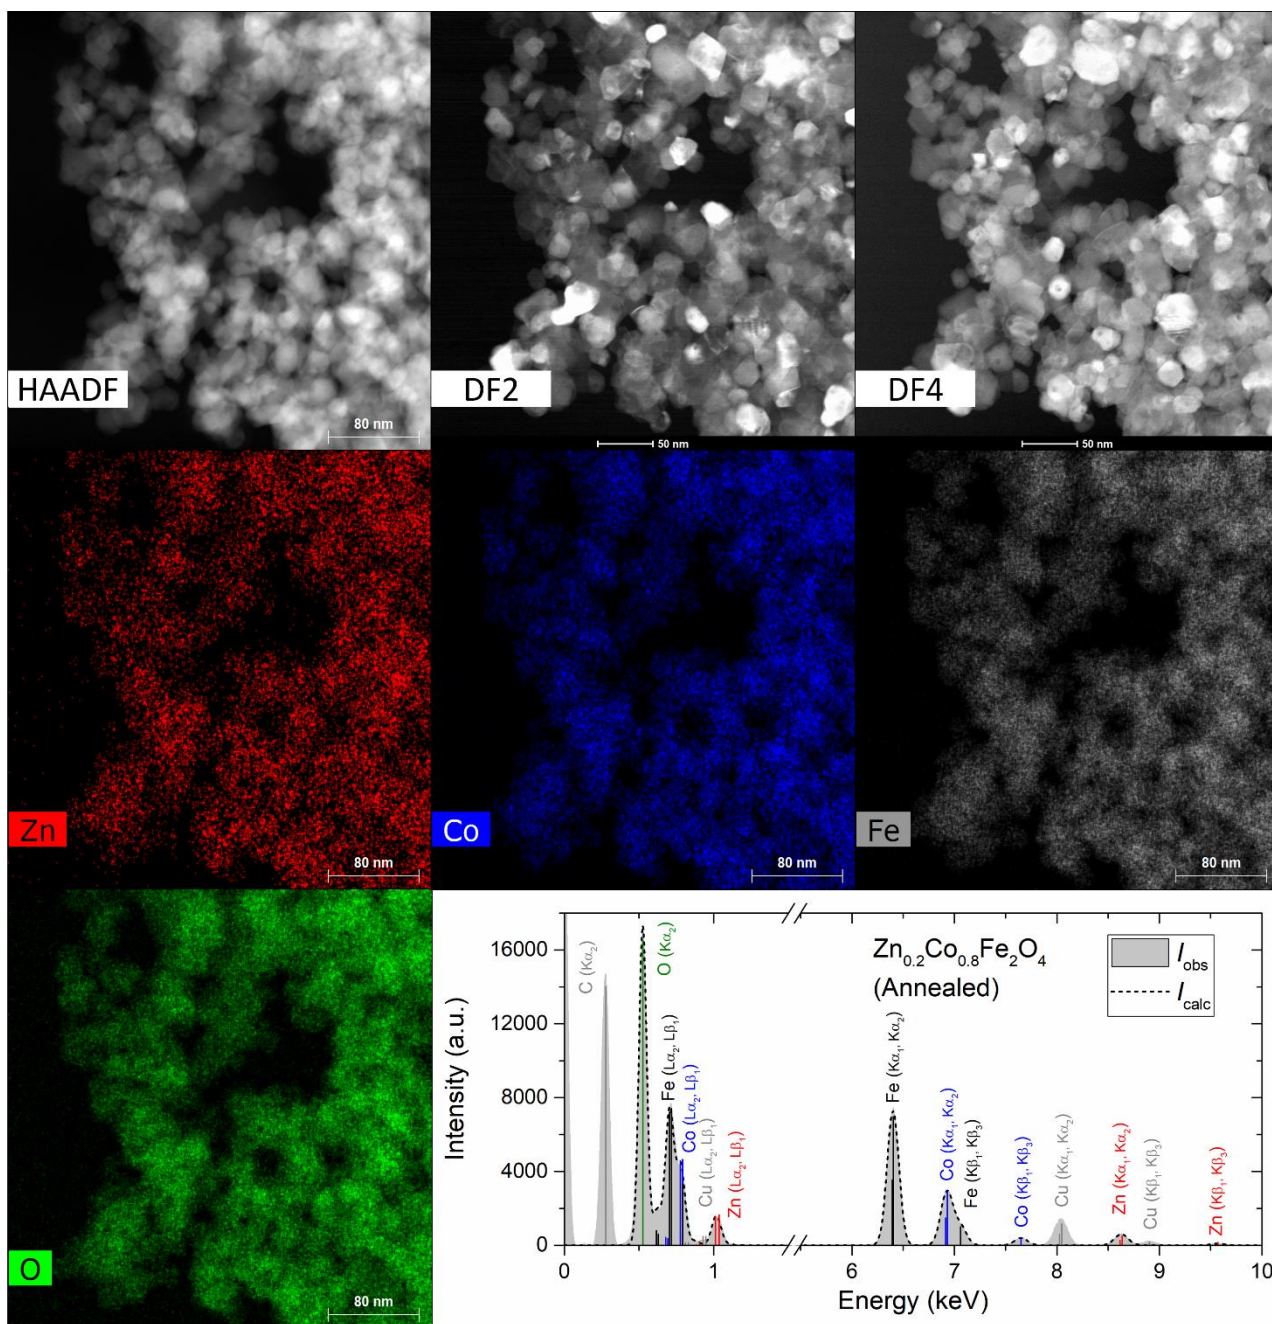

Figure S17: STEM-HAADF image, STEM-DF images and elemental maps illustrating the distribution of the constituent elements in the annealed  $\text{Zn}_{0.2}\text{Co}_{0.8}\text{Fe}_2\text{O}_4$  ( $x=0.2$ ) sample. In the bottom right corner, the corresponding energy-dispersive X-ray spectrum from the region (gray area) and fit to the spectrum (dashed black line) is shown.

## STEM-EDS maps + spectrum ( $x=0.4$ , Annealed)

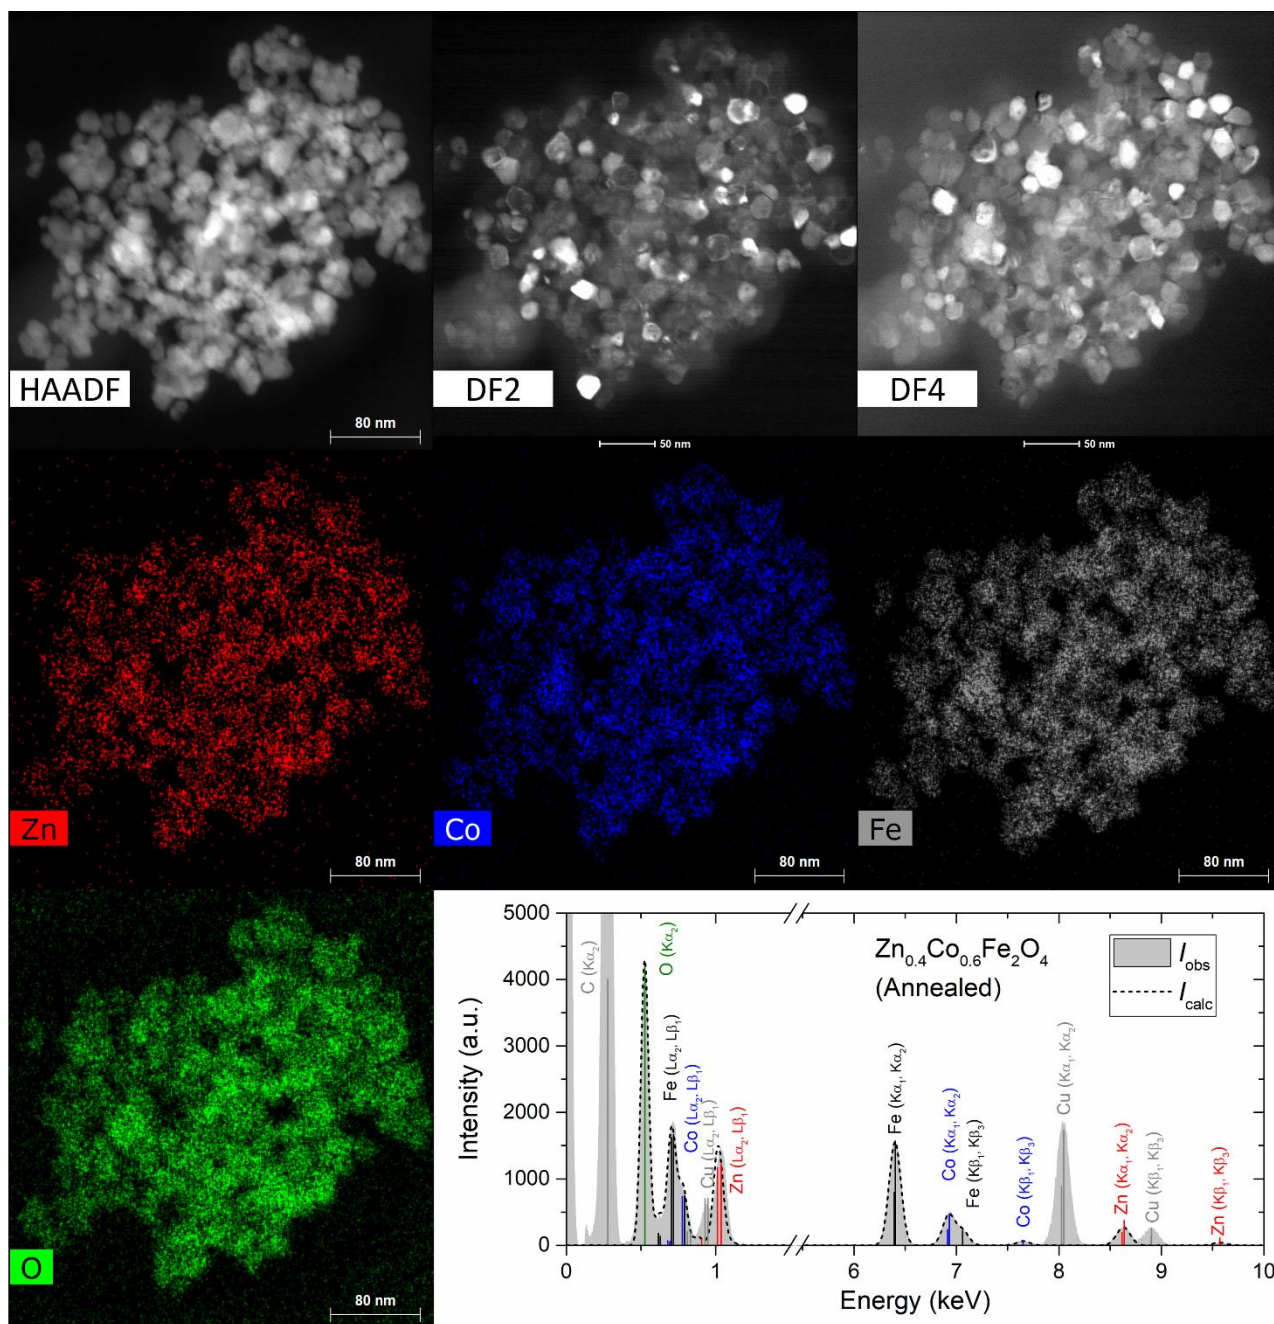

Figure S18: STEM-HAADF image, STEM-DF images and elemental maps illustrating the distribution of the constituent elements in the annealed  $\text{Zn}_{0.4}\text{Co}_{0.6}\text{Fe}_2\text{O}_4$  ( $x=0.4$ ) sample. In the bottom right corner, the corresponding energy-dispersive X-ray spectrum from the region (gray area) and fit to the spectrum (dashed black line) is shown.



## STEM-EDS maps + spectrum ( $x=0.8$ , Annealed)

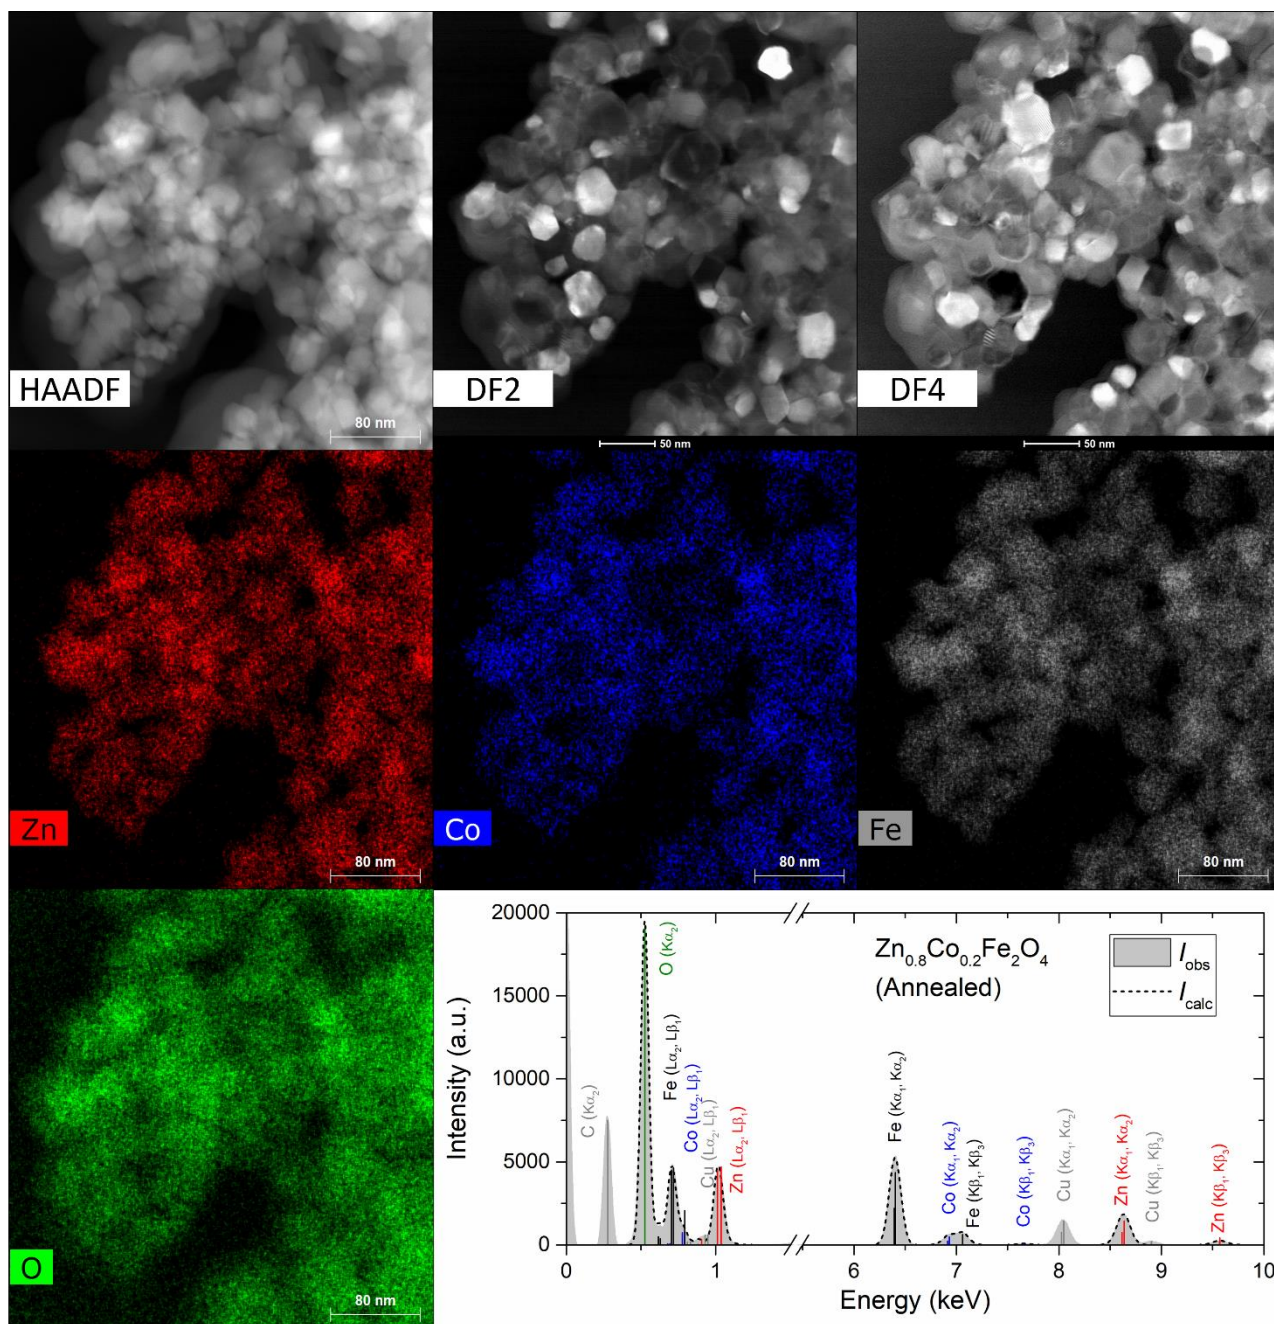

Figure S19: STEM-HAADF image, STEM-DF images and elemental maps illustrating the distribution of the constituent elements in the annealed  $\text{Zn}_{0.8}\text{Co}_{0.2}\text{Fe}_2\text{O}_4$  ( $x=0.8$ ) sample. In the bottom right corner, the corresponding energy-dispersive X-ray spectrum from the region (gray area) and fit to the spectrum (dashed black line) is shown.

## Vibrating sample magnetometry data

Hysteresis curves ( $x=0.0-1.0$ , As-synthesized)

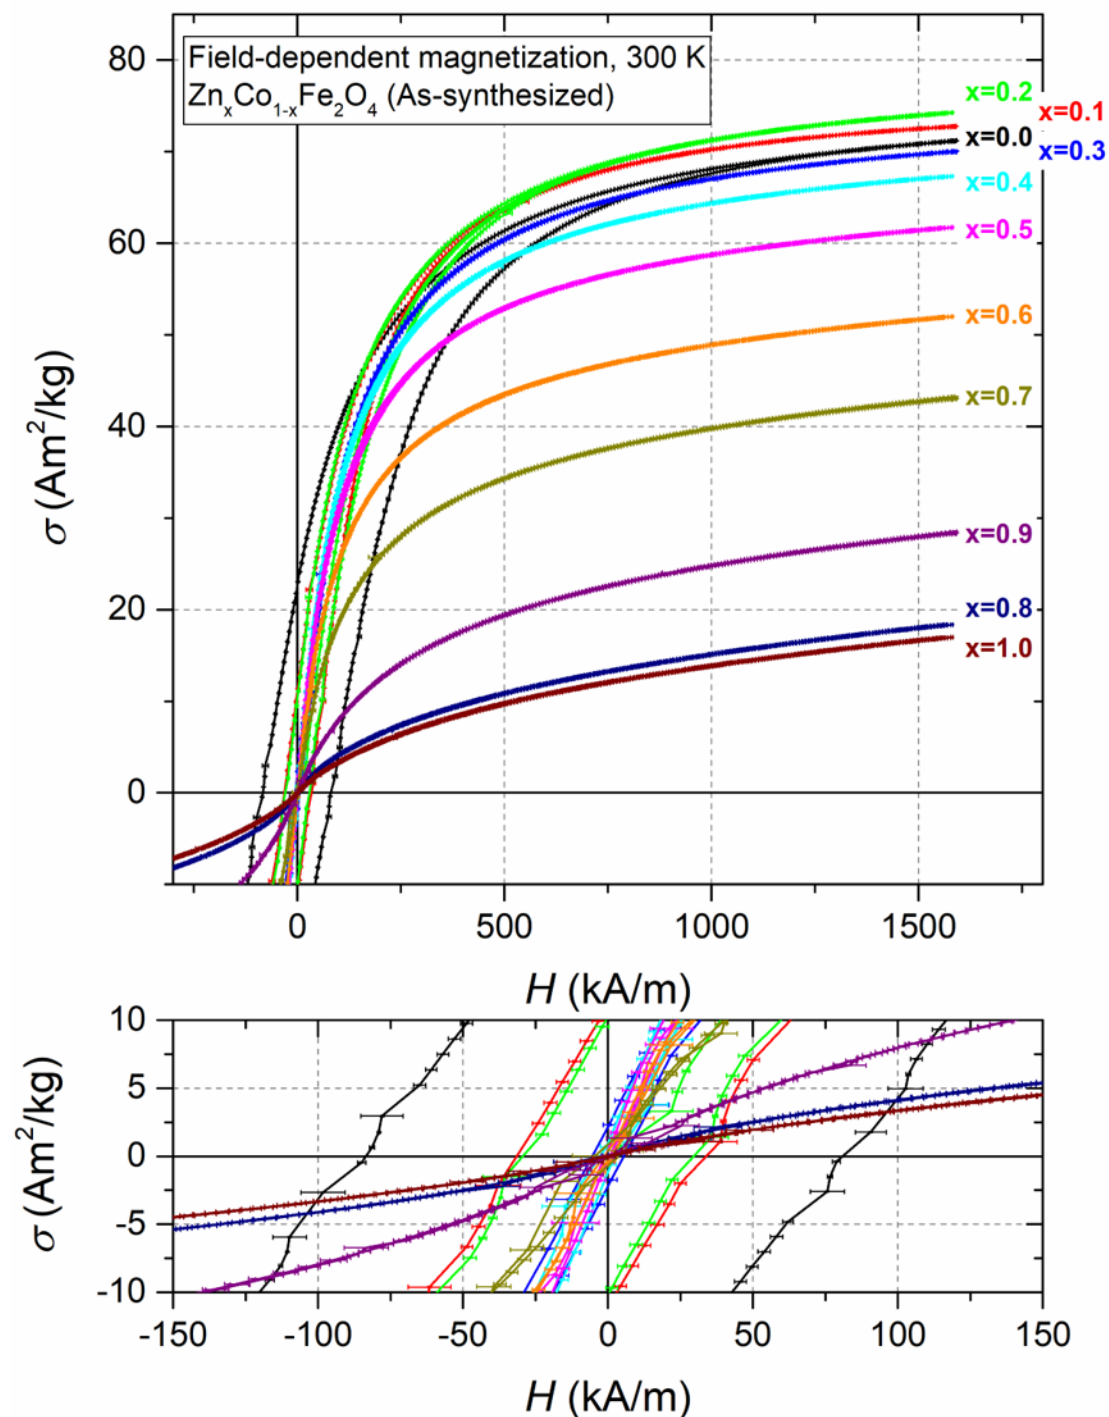

Figure S20: Room temperature field-dependent magnetization curves of the indicated as-synthesized  $\text{Zn}_x\text{Co}_{1-x}\text{Fe}_2\text{O}_4$  samples and a magnification of the low  $H$  region.

### Hysteresis curves (x=0.0-1.0, Annealed)

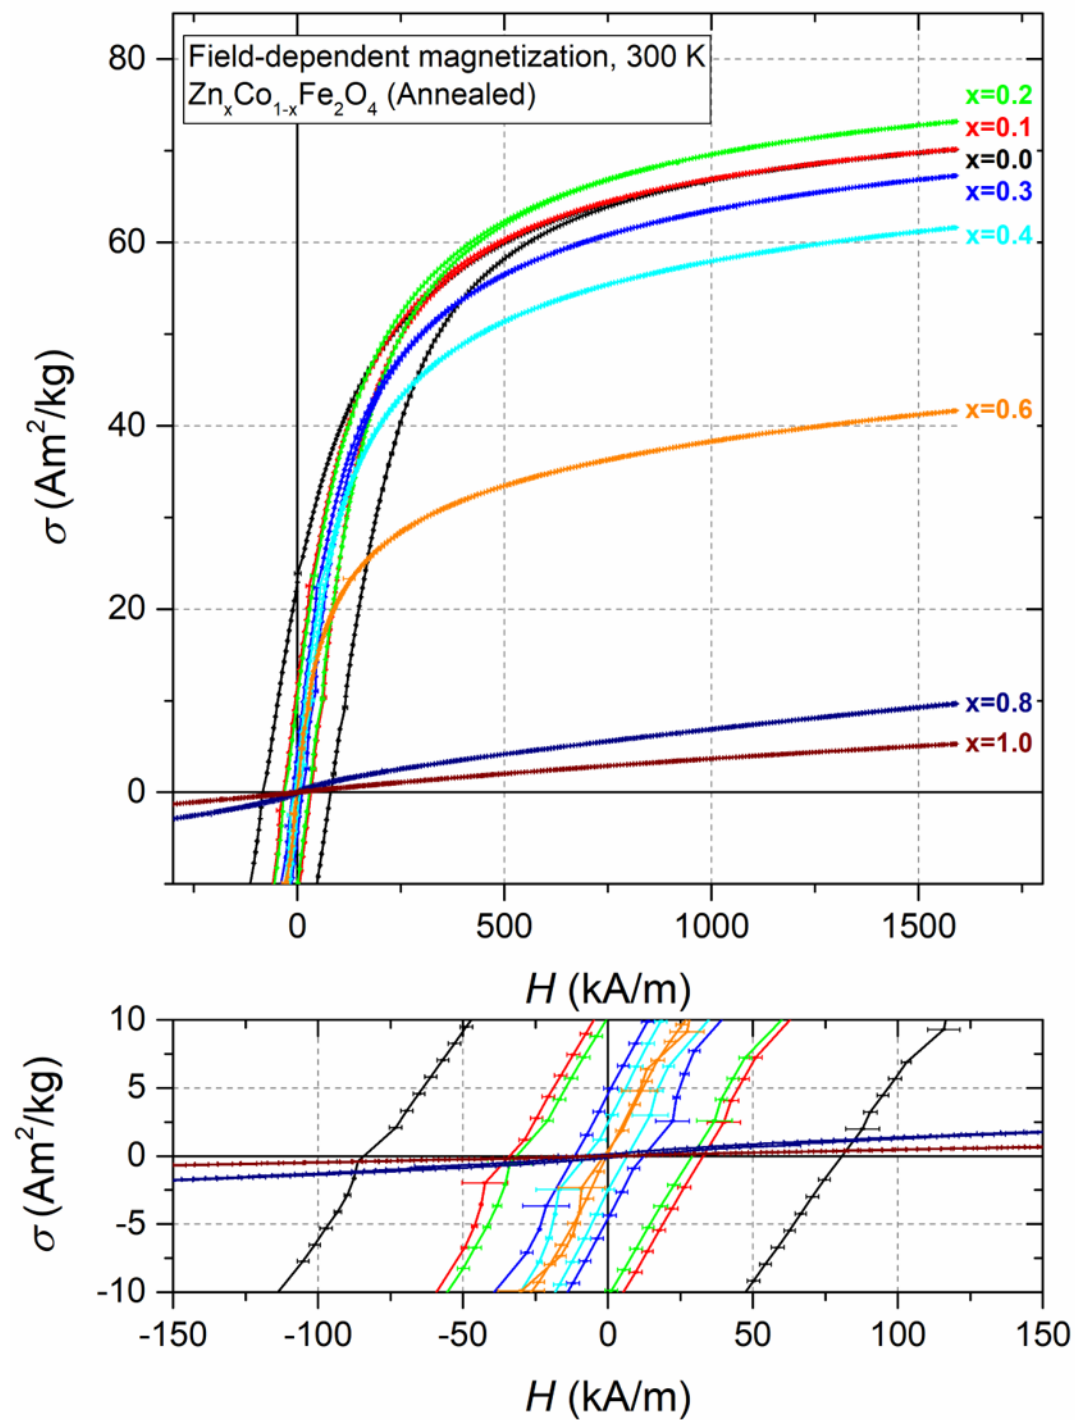

Figure S21: Room temperature field-dependent magnetization curves of the indicated annealed  $\text{Zn}_x\text{Co}_{1-x}\text{Fe}_2\text{O}_4$  samples and a magnification of the low  $H$  region.

## Coercive field and magnetic remanence

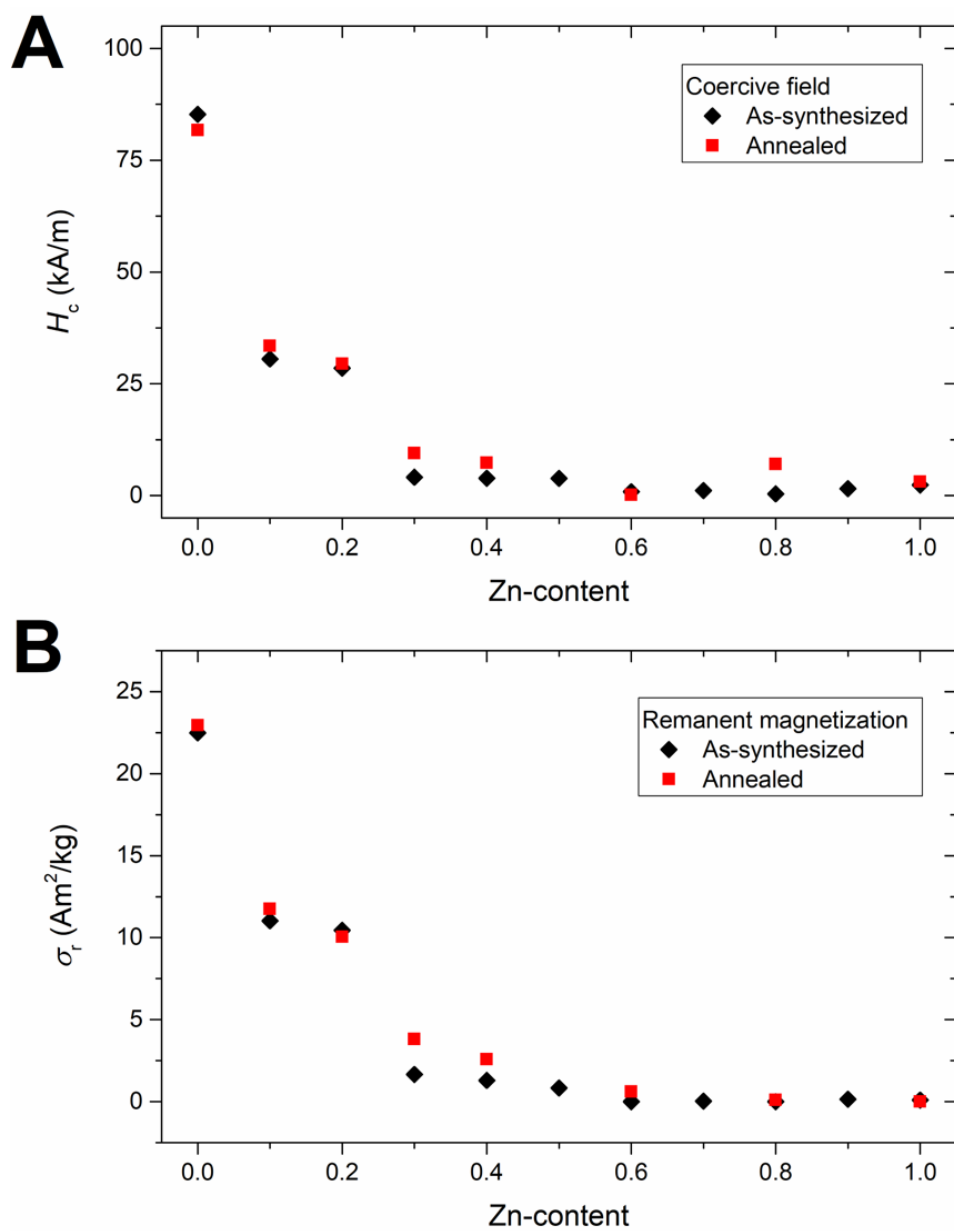

Figure S22: A) Coercive field ( $H_c$ ) as function of Zn-content for as-synthesized and annealed  $\text{Zn}_x\text{Co}_{1-x}\text{Fe}_2\text{O}_4$  samples. B) Remanent magnetization ( $\sigma_r$ ) as function of Zn content for as synthesized and annealed  $\text{Zn}_x\text{Co}_{1-x}\text{Fe}_2\text{O}_4$  samples.



## References

1. F. Gozuak, Y. Koseoglu, A. Baykal and H. Kavas, *J. Magn. Magn. Mater.*, 2009, **321**, 2170-2177.
2. H. Sozeri, Z. Durmus and A. Baykal, *Mater. Res. Bull.*, 2012, **47**, 2442-2448.
3. R. Topkaya, A. Baykal and A. Demir, *J. Nanopart. Res.*, 2013, **15**, 1359.
4. E. Hema, A. Manikandan, P. Karthika, S. A. Antony and B. R. Venkatraman, *J Supercond Nov Magn*, 2015, **28**, 2539-2552.
5. Y. Koseoglu, A. Baykal, F. Gozuak and H. Kavas, *Polyhedron*, 2009, **28**, 2887-2892.
6. A. K. Azad, A. K. M. Zakaria, M. Y. Jewel, A. Khan, S. M. Yunus, I. Kamal, T. K. Datta and S. G. Eriksson, *Aip. Conf. Proc.*, 2015, **1660**, 090050.
7. H. Malik, A. Mahmood, K. Mahmood, M. Y. Lodhi, M. F. Warsi, I. Shakir, H. Wahab, M. Asghar and M. A. Khan, *Ceram. Int.*, 2014, **40**, 9439-9444.
8. T. Slatineanu, A. R. Iordan, V. Oancea, M. N. Palamaru, I. Dumitru, C. P. Constantin and O. F. Caltun, *Mater. Sci. Eng. B-Adv.*, 2013, **178**, 1040-1047.
9. R. S. Yadav, J. Havlica, M. Hnatko, P. Sajgalik, C. Alexander, M. Palou, E. Bartonickova, M. Bohac, F. Frajkorova, J. Masilko, M. Zmrzly, L. Kalina, M. Hajudchova and V. Enev, *J. Magn. Magn. Mater.*, 2015, **378**, 190-199.
10. V. Mameli, A. Musinu, A. Ardu, G. Ennas, D. Peddis, D. Niznansky, C. Sangregorio, C. Innocenti, N. T. K. Thanh and C. Cannas, *Nanoscale*, 2016, **8**, 10124-10137.
